# Supplementary material for: Perylenequione Derivatives with Anticancer Activities Isolated from the Marine Sponge-Derived Fungus, Alternaria sp. SCSIO41014
Source: PubMed Central journal article supplement (PMC6117713; doi:10.3390/md16080280), 2018-08-14
Supplement: marinedrugs-16-00280-s001.pdf [file marinedrugs-16-00280-s001.pdf]

# Perylenequione Derivatives with Anticancer Activities Isolated from the Marine Sponge-Derived Fungus, *Alternaria* sp. SCSIO41014

Xiaoyan Pang <sup>1,2</sup>, Xiuping Lin <sup>1</sup>, Pei Wang <sup>3</sup>, Xuefeng Zhou <sup>1</sup>, Bin Yang <sup>1</sup>, Junfeng Wang <sup>1,\*</sup> and Yonghong Liu <sup>1,2,\*</sup>

<sup>1</sup> CAS Key Laboratory of Tropical Marine Bio-resources and Ecology, Guangdong Key Laboratory of Marine Materia Medica, RNAM Center for Marine Microbiology, South China Sea Institute of Oceanology, Chinese Academy of Sciences, Guangzhou 510301, China; luckygirlpxy@163.com (X.P.); xiupinglin@hotmail.com (X.L.); xfzhou@scsio.ac.cn (X.Z.); yangbin@scsio.ac.cn (B.Y.)

<sup>2</sup> University of Chinese Academy of Sciences, Beijing 100049, China

<sup>3</sup> Key Laboratory of Biology and Genetic Resources of Tropical Crops, Ministry of Agriculture, Institute of Tropical Bioscience and Biotechnology, Chinese Academy of Tropical Agricultural Sciences, Haikou 571101, China; wangpei@itbb.org.cn

\* Correspondence: wangjunfeng@scsio.ac.cn (J.F.W.); yonghongliu@scsio.ac.cn (Y.H.L.); Tel.: +86-020-8902-3174 (J.F.W.); +86-020-8902-3244 (Y.H.L.)

**Table of Contents****Original data of antibacterial activity assay.**

**Figure S1** Pictures of inhibition zones in the filter paper diffusion test

**Table S1** The growth conditions of the *Staphylococcus aureus* after add different dilution concentration of compounds **10**, **25** and ampicillin.

**The 16S rRNA gene sequences data of *Alternaria* sp. SCSIO41014.****Theory and Calculation Details of compound 1.**

**Figure S2.** <sup>1</sup>H NMR spectrum of **1** in DMSO-*d*<sub>6</sub>.

**Figure S3.** <sup>13</sup>C NMR spectrum of **1** in DMSO-*d*<sub>6</sub>.

**Figure S4.** DEPT NMR spectrum of **1** in DMSO-*d*<sub>6</sub>.

**Figure S5.** <sup>1</sup>H-<sup>1</sup>H COSY spectrum of **1** in DMSO-*d*<sub>6</sub>.

**Figure S6.** HSQC spectrum of **1** in DMSO-*d*<sub>6</sub>.

**Figure S7.** HMBC spectrum of **1** in DMSO-*d*<sub>6</sub>.

**Figure S8.** NOESY spectrum of **1** in DMSO-*d*<sub>6</sub>.

**Figure S9.** HRESIMS spectrum of **1** in CD<sub>3</sub>OD

**Figure S10.** <sup>1</sup>H NMR spectrum of **2** in DMSO-*d*<sub>6</sub>.

**Figure S11.** <sup>13</sup>C NMR spectrum of **2** in DMSO-*d*<sub>6</sub>.

**Figure S12.** DEPT NMR spectrum of **2** in DMSO-*d*<sub>6</sub>.

**Figure S13.** <sup>1</sup>H-<sup>1</sup>H COSY spectrum of **2** in DMSO-*d*<sub>6</sub>.

**Figure S14.** HSQC spectrum of **2** in DMSO-*d*<sub>6</sub>.

**Figure S15.** HMBC spectrum of **2** in DMSO-*d*<sub>6</sub>.

**Figure S16.** HRESIMS spectrum of **2** in CD<sub>3</sub>OD.

**Figure S17.** <sup>1</sup>H NMR spectrum of **3** in CD<sub>3</sub>OD.

**Figure S18.** <sup>13</sup>C NMR spectrum of **3** in CD<sub>3</sub>OD.

**Figure S19.** <sup>1</sup>H-<sup>1</sup>H COSY spectrum of **3** in CD<sub>3</sub>OD.

**Figure S20.** HSQC spectrum of **3** in CD<sub>3</sub>OD.

**Figure S21.** HMBC spectrum of **3** in CD<sub>3</sub>OD.

**Figure S22.** NOESY spectrum of **3** in CD<sub>3</sub>OD.

**Figure S23.** HRESIMS spectrum of **3** in CD<sub>3</sub>OD.

**Figure S24.** <sup>1</sup>H NMR spectrum of **4/5** in CD<sub>3</sub>OD.

**Figure S25.** <sup>13</sup>C NMR spectrum of **4/5** in CD<sub>3</sub>OD.

**Figure S26.** <sup>1</sup>H-<sup>1</sup>H COSY spectrum of **4/5** in CD<sub>3</sub>OD.

**Figure S27.** HSQC spectrum of **4/5** in CD<sub>3</sub>OD.

**Figure S28.** HMBC spectrum of **4/5** in CD<sub>3</sub>OD.

**Figure S29.** HRESIMS spectrum of **4/5** in CD<sub>3</sub>OD.

**Figure S30.** Chiral-phase HPLC analyses of compounds **4** and **5**.

**Figure S31.** <sup>1</sup>H NMR spectrum of **6/7** in CD<sub>3</sub>OD.

**Figure S32.** <sup>13</sup>C NMR spectrum of **6/7** in CD<sub>3</sub>OD.

**Figure S33.** DEPT NMR spectrum of **6/7** in CD<sub>3</sub>OD.

**Figure S34.** COSY spectrum of **6/7** in CD<sub>3</sub>OD.

**Figure S35.** HSQC spectrum of **6/7** in CD<sub>3</sub>OD.

**Figure S36.** HMBC spectrum of **6/7** in CD<sub>3</sub>OD.

**Figure S37.** NOESY spectrum of **6/7** in CD<sub>3</sub>OD.

**Figure S38.** HRESIMS spectrum of **6/7** in CD<sub>3</sub>OD.

**Figure S39.** Chiral-phase HPLC analyses of compounds **6** and **7**.

### Original Data of Antibacterial Activity Assay

Compounds **1–28** were test for antibacterial activities against *Staphylococcus aureus* (ATCC 29213) using the agar filter paper diffusion [1]. *S. aureus* stored in glycerin were activated in LB medium (10 g tryptone, 5 g yeast extract, 10 g NaCl, distilled water added up to 1,000 mL, pH 7.2–7.4) in a shaker-incubator at 37 °C and 180 r.p.m for 24 h. Then dilution-plate method was used to get effective concentration of 10<sup>6</sup>–10<sup>7</sup> CFU ml<sup>-1</sup>. The plate of LB medium was painted with 100 µL of *S. aureus* with effective concentration. The sterile filter paper (a diameter of 5 mm) was painted with each 10 µL of DMSO as negative control, ampicillin (0.5 mg/mL) as positive control and compounds **1–28** (5 mg/mL), respectively. Compounds **10** and **25** with 50 µg/disc displayed an inhibition zone with a diameter of about 21 and 15 mm, and ampicillin with 5 µg/disc showed an inhibition zone with a diameter of about 30 mm (Figure S1), respectively. Further, their minimum inhibitory concentrations (MIC) were evaluated in 96-well microtiter plates using a modification of the broth microdilution method [1]. Each well was added 100 µL of *S. aureus* with effective concentration, 90 µL of sterile LB medium and 10 µL of tested compounds, respectively. Compounds **10,25** and ampicillin with different concentration were added with final concentration as showed in Table S1 and replicated three times. The MIC value of compound **25** was 31.25 µg/mL, while compound **10** showed more than 500 µg/mL. Ampicillin was used as positive control with the MIC value of 6.25 µg/mL.

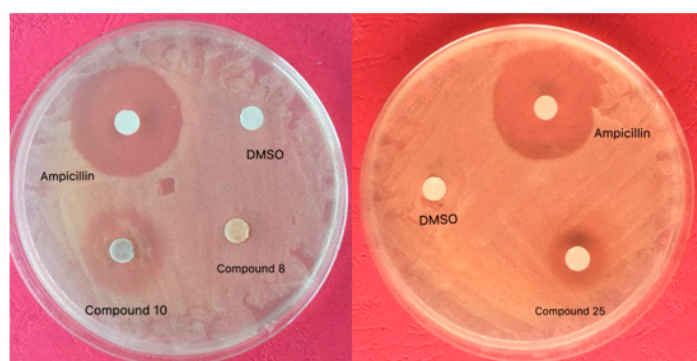

**Figure S1** Pictures of inhibition zones in the filter paper diffusion test.

**Table S1** The growth conditions of the *Staphylococcus aureus* after add different dilution concentration of compounds **10, 25** and ampicillin.

| Concentration<br>µg/mL | 500 | 250  | 125  | 62.5 | 31.25 | 15.63 | 7.82 | 3.91 | 1.96 | 0.98 | 0.49 | DMSO |
|------------------------|-----|------|------|------|-------|-------|------|------|------|------|------|------|
| <b>10</b>              | +   | +    | +    | +    | +     | +     | +    | +    | +    | +    | +    | +    |
| <b>25</b>              | -   | -    | -    | -    | -     | +     | +    | +    | +    | +    | +    | +    |
| Concentration<br>µg/mL | 25  | 12.5 | 6.25 | 3.13 | 1.57  | 0.79  | 0.40 | 0.20 | 0.10 | 0.05 | 0.03 | DMSO |
| Ampicillin             | -   | -    | -    | +    | +     | +     | +    | +    | +    | +    | +    | +    |

“+” indicated some *S. aureus* had grown. “-” indicated no *S. aureus* grew.

### Detailed Process of Antitumor Activity Assay

Cytotoxicity was assayed with the CCK-8 (Dojindo, Kumamoto Prefecture, Japan) method [2]. Cell lines K562, SGC-7901 and BEL-7402 were purchased from Shanghai Cell Bank, Chinese Academy of Sciences. Cells were routinely grown and maintained in DMEM or RPMI media with 10% fetal bovine serum and with 1% streptomycin/penicillin. All cell lines were incubated in a Thermo/ Forma Scientific CO<sub>2</sub> water-jacketed incubator with 5% CO<sub>2</sub> in air at 37 °C. A cell viability assay was

determined with the CCK-8 assay. Cells were seeded at a density of 400–800 cells/well in 384-well plates and treated with various concentrations of compounds or solvent control. After 72 h incubation, CCK-8 reagent was added, and absorbance was measured at 450 nm using an Envision 2104 multilabel reader (PerkinElmer, Waltham, MA, USA). Dose–response curves were plotted to determine the  $IC_{50}$  values using Prism 5.0 (GraphPad Software Inc., San Diego, CA, USA). Taxol was used as the positive control, with  $IC_{50}$  values of  $0.18 \pm 0.20$ ,  $0.89 \pm 0.15$  and  $0.54 \pm 0.20$   $\mu\text{g/mL}$ , respectively.

### The 16S rRNA Gene Sequences Data of *Alternaria* sp. SCSIO41014

```
CTGGATCTCTCGGGGTACAGCCTTGCTGAATTATTCACCCTTGTCTTTTGCCTACTTCTTGTT
TCCTTGGTGGGTTCCGCCACCACTAGGACAAACATAAACCTTTTGTAAATTGCAATCAGCGTC
AGTAACAAATTAATAATTACAACCTTCAACAACGGATCTCTTGGTTCTGGCATCGATGAAG
AACGCAGCGAAATGCGATAAGTAGTGTGAATTGCAGAATTCAGTGAATCATCGAATCTTTG
AACGCACATTGCGCCCTTTGGTATTCCAAAGGGCATGCCTGTTTCGAGCGTCATTTGTACCCT
CAAGCTTTGCTTGGTGTGGGCGTCTTGTCTCTAGCTTTGCTGGAGACTCGCCTTAAAGTAAT
TGGCAGCCGGCCTACTGGTTTCGGAGCGCAGCACAAAGTCGCACTCTCTATCAGCAAAGGTC
TAGCATCCATTAAGCCTTTTTTCAACTTTTGACCTCGGATCAGGTAGGGATACCCGCTGAAC
TTAAGCATATCA
```

### Theory and Calculation Details of Compound 1

To determine the absolute configuration of **1**, a computational modeling study was conducted using the Gaussian 03 program package [3,4]. The ECD of the lowest energy conformer was then calculated by the TDDFT method at the B3LYP/6-31G(d) level in methanol solution.

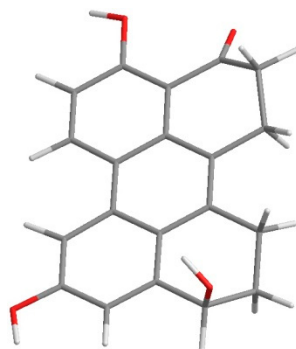

B3LYP/6-31G(d) optimized lowest energy 3D conformer of **1**.

### References

1. Wang, J.F.; Cong, Z.W.; Huang, X.L.; Hou, C.X.; Chen, W.B.; Tu, Z.C.; Huang, D.Y.; Liu, Y.H. *Org. Lett.* **2018**, *20*, 1371–1374.
2. Wang, J.F.; Wei, X.Y.; Qin, X.C.; Tian, X.P.; Liao, L.; Li, K.M.; Zhou, X.F.; Yang, X.W.; Wang, F.Z.; Zhang, T.Y.; et al. *J. Nat. Prod.* **2016**, *79*, 59–65.
3. Gaussian 03, Revision E.01, Frisch, M.J.; Trucks, G.W.; Schlegel, H.B.; Scuseria, G.E.; Robb, M.A.; Cheeseman, J.R.; Montgomery, J.A.; Vreven, Jr.T.; Kudin, K.N.; Burant, J.C.; et al.; Gaussian, Inc., Wallingford CT, 2004. Available online: <http://gaussian.com/g03citation/> (accessed on 8 August 2018).
4. Sai, C.; Li, D.; Xue, C.; Wang, K.; Hu, P.; Pei, Y.; Bai, J.; Jing, Y.; Li, Z.; Hua, H. *Org. Lett.* **2015**, *17*, 4102–4105.

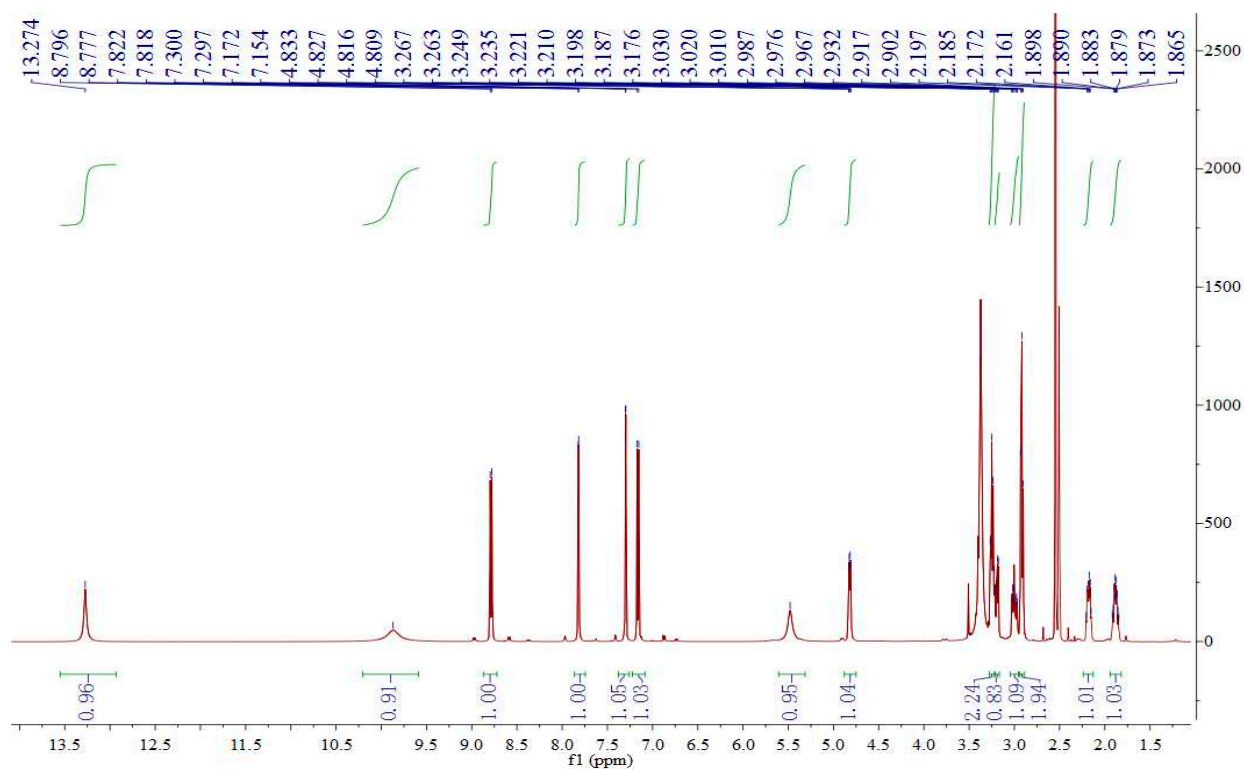Figure S2. <sup>1</sup>H NMR spectrum of 1 in DMSO-*d*<sub>6</sub>.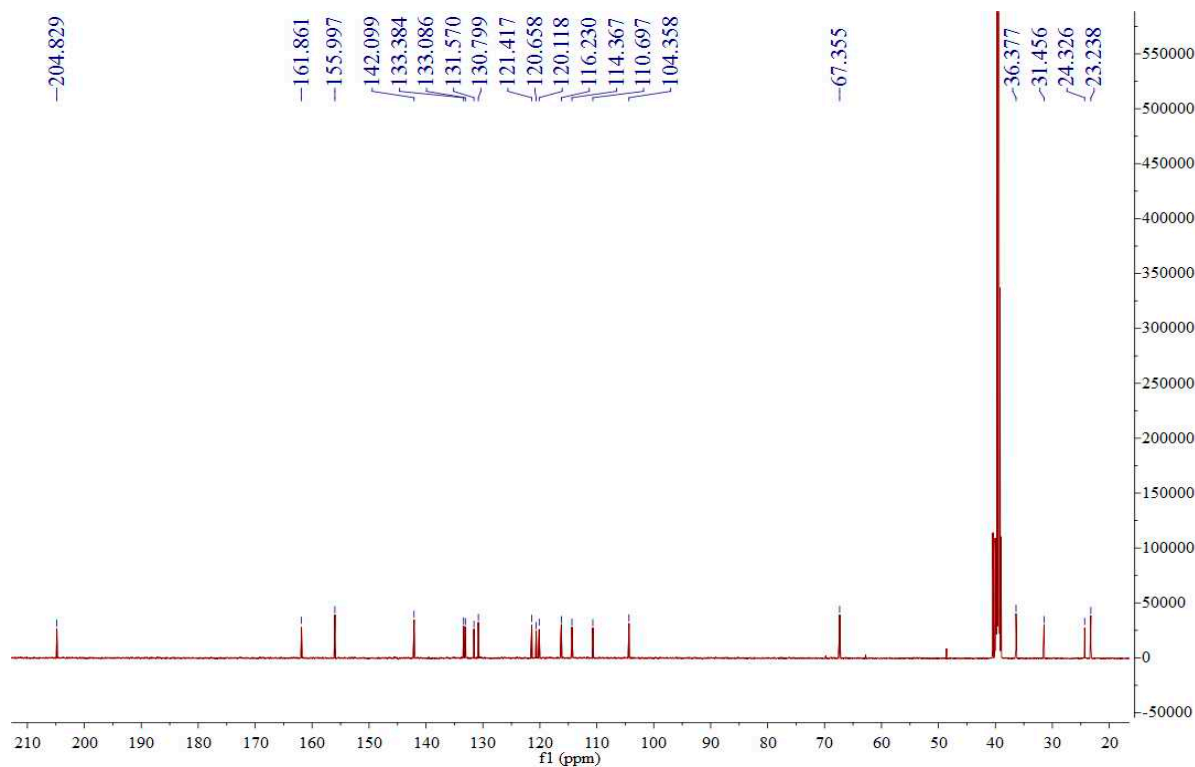Figure S3. <sup>13</sup>C NMR spectrum of 1 in DMSO-*d*<sub>6</sub>.

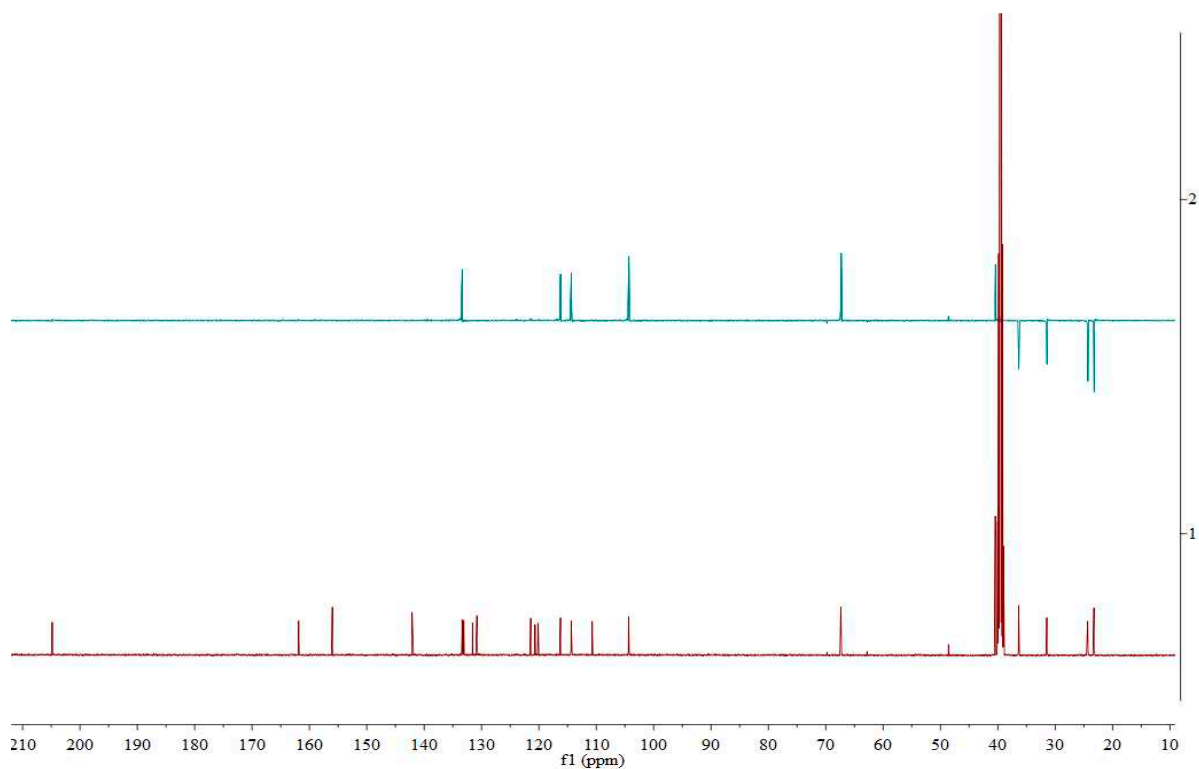

Figure S4. DEPT NMR spectrum of **1** in DMSO-*d*<sub>6</sub>.

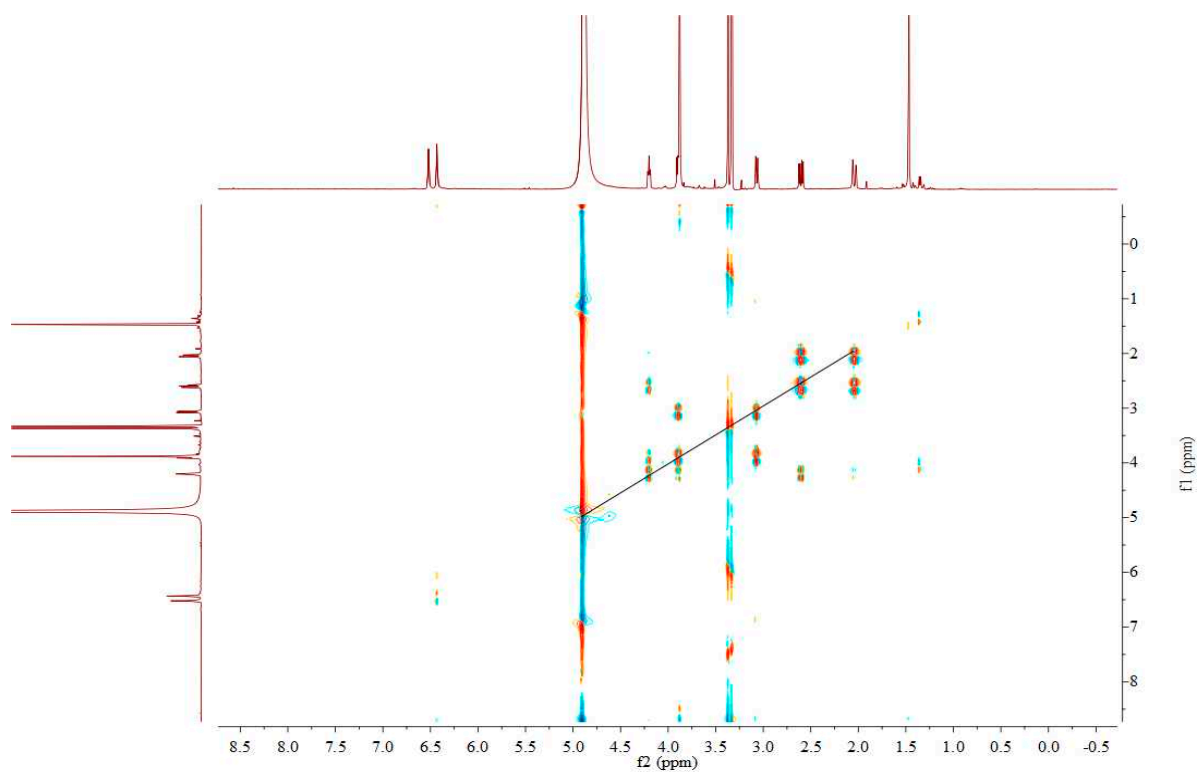

Figure S5. <sup>1</sup>H-<sup>1</sup>H COSY spectrum of **1** in DMSO-*d*<sub>6</sub>.

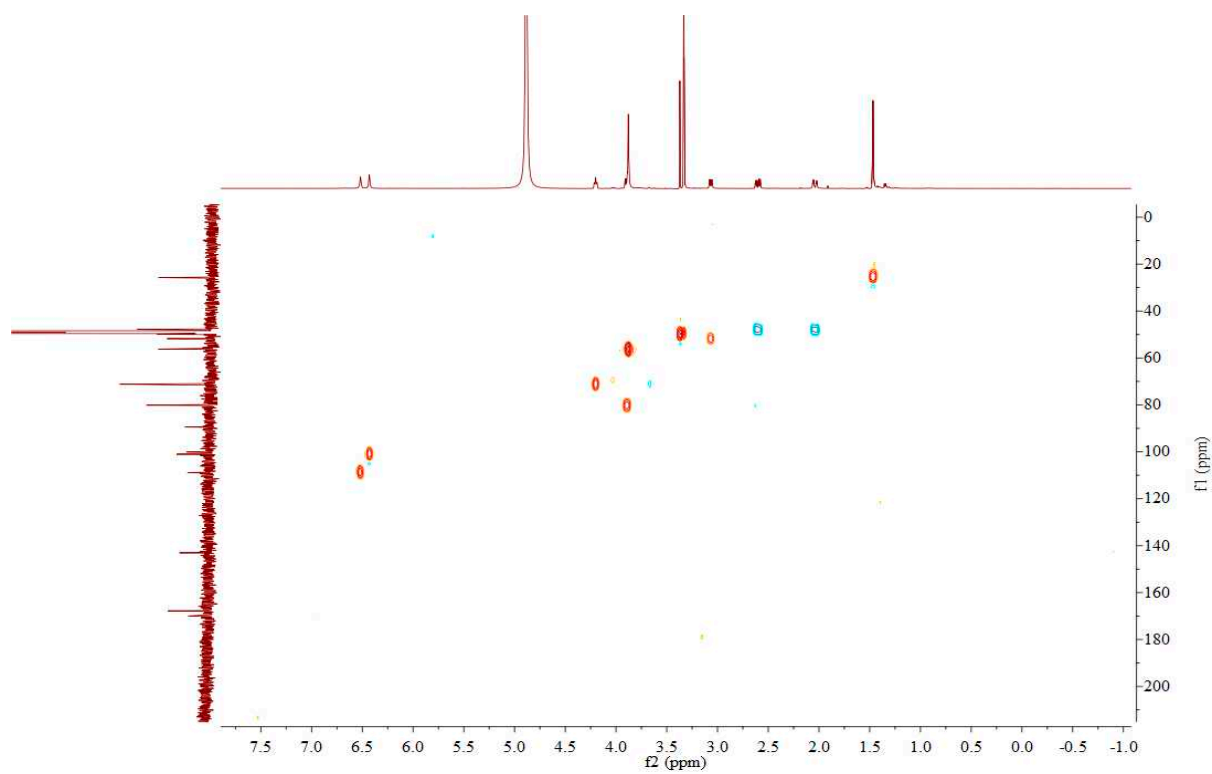

Figure S6. HSQC spectrum of **1** in DMSO-*d*<sub>6</sub>.

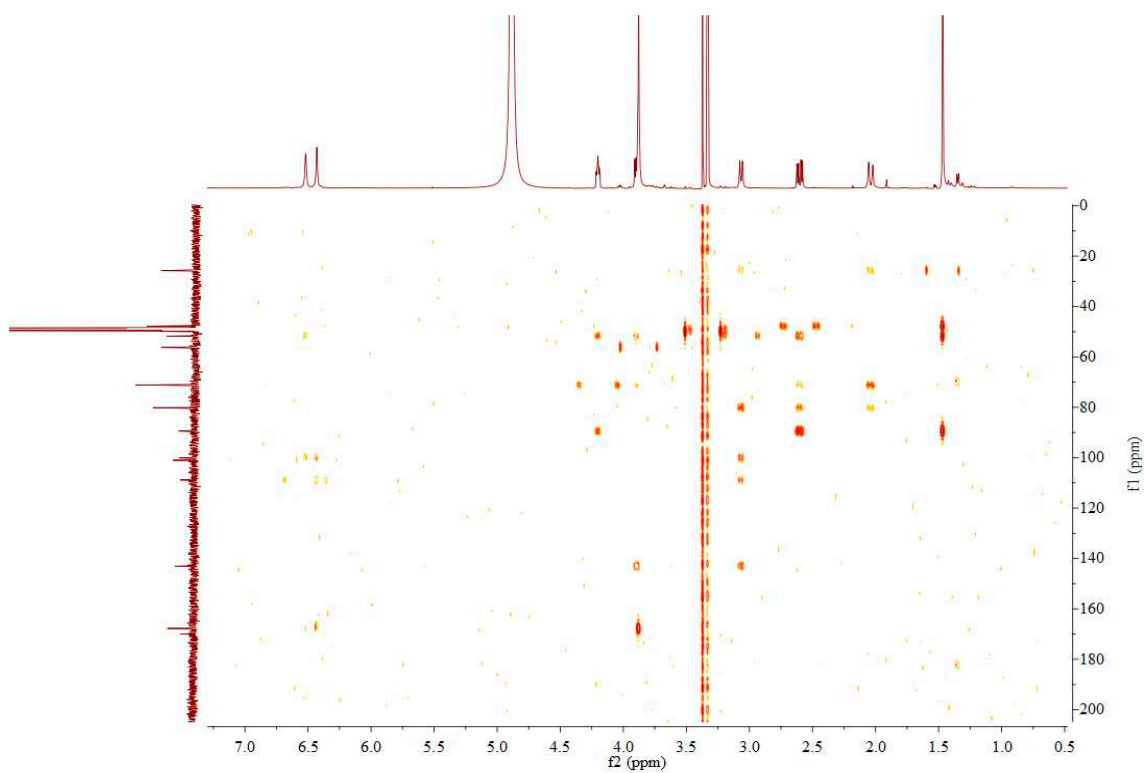

Figure S7. HMBC spectrum of **1** in DMSO-*d*<sub>6</sub>.

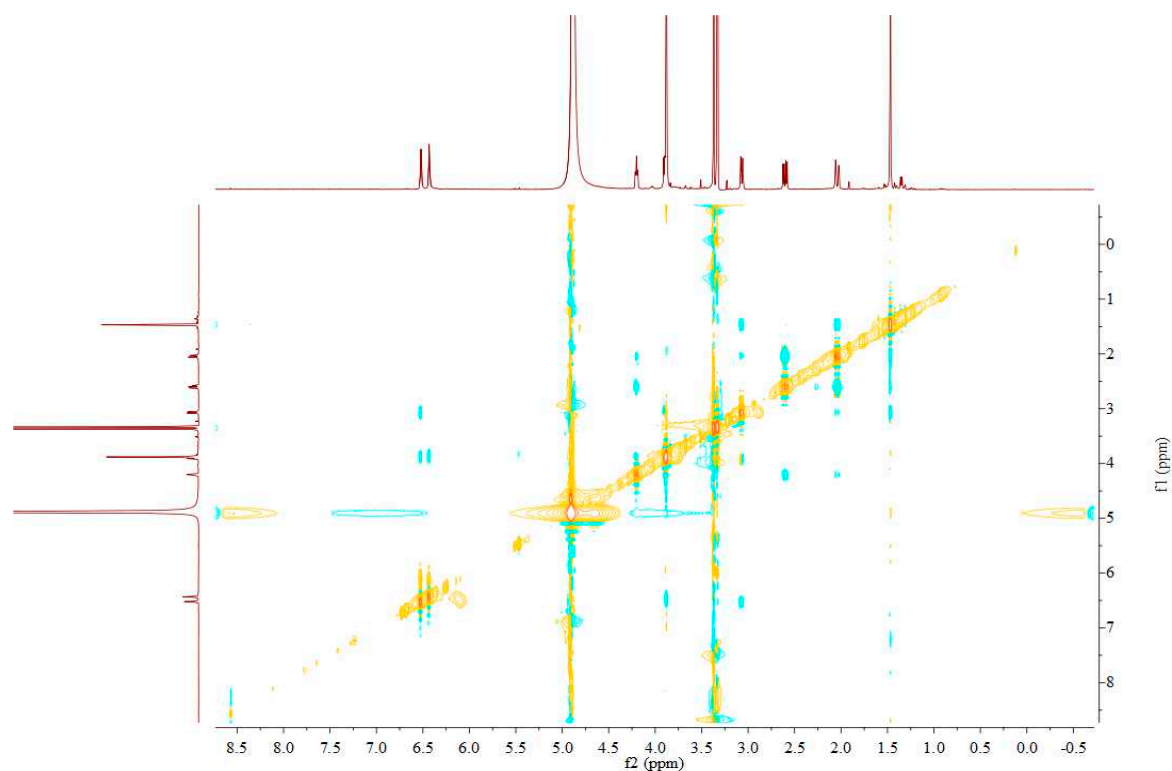Figure S8. NOESY spectrum of 1 in DMSO-*d*<sub>6</sub>.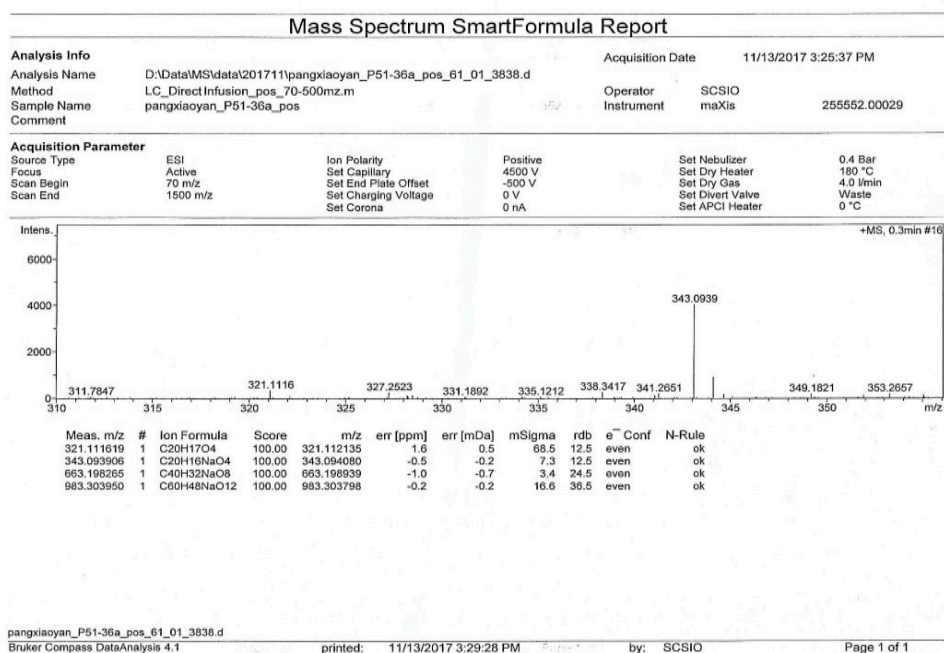Figure S9. HRESIMS spectrum of 1 in CD<sub>3</sub>OD.



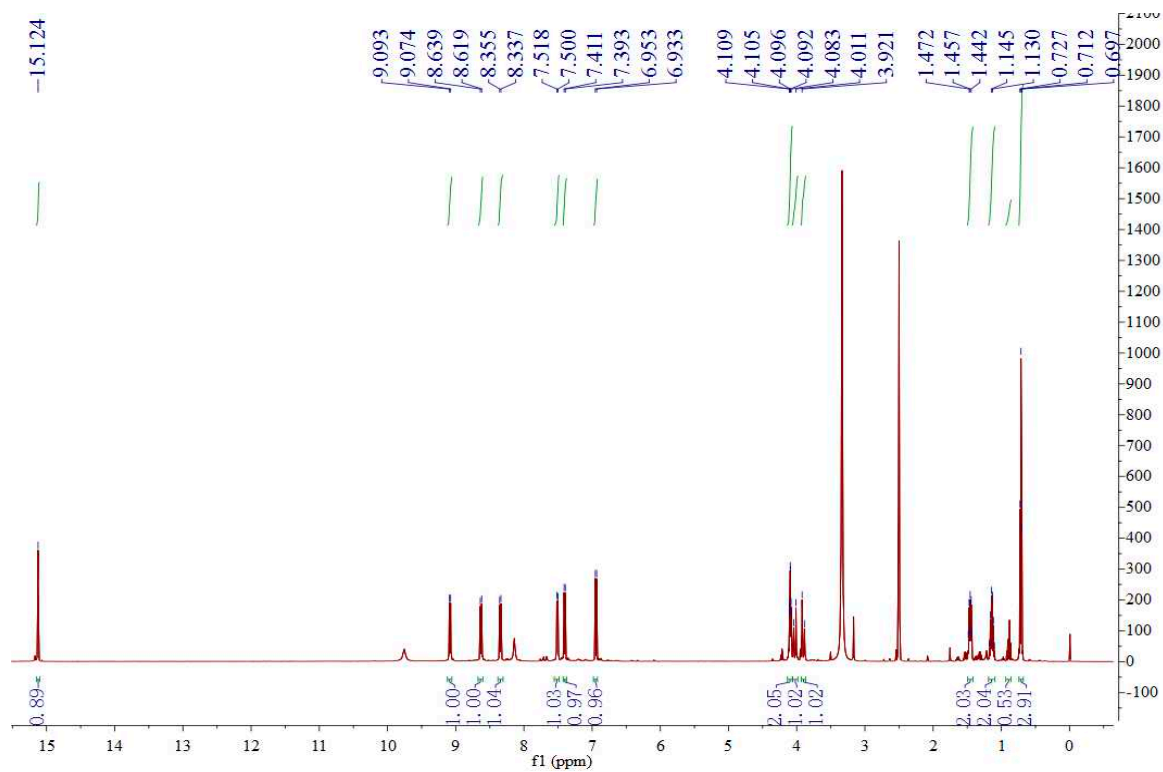Figure S10.  $^1\text{H}$  NMR spectrum of **2** in  $\text{DMSO-}d_6$ .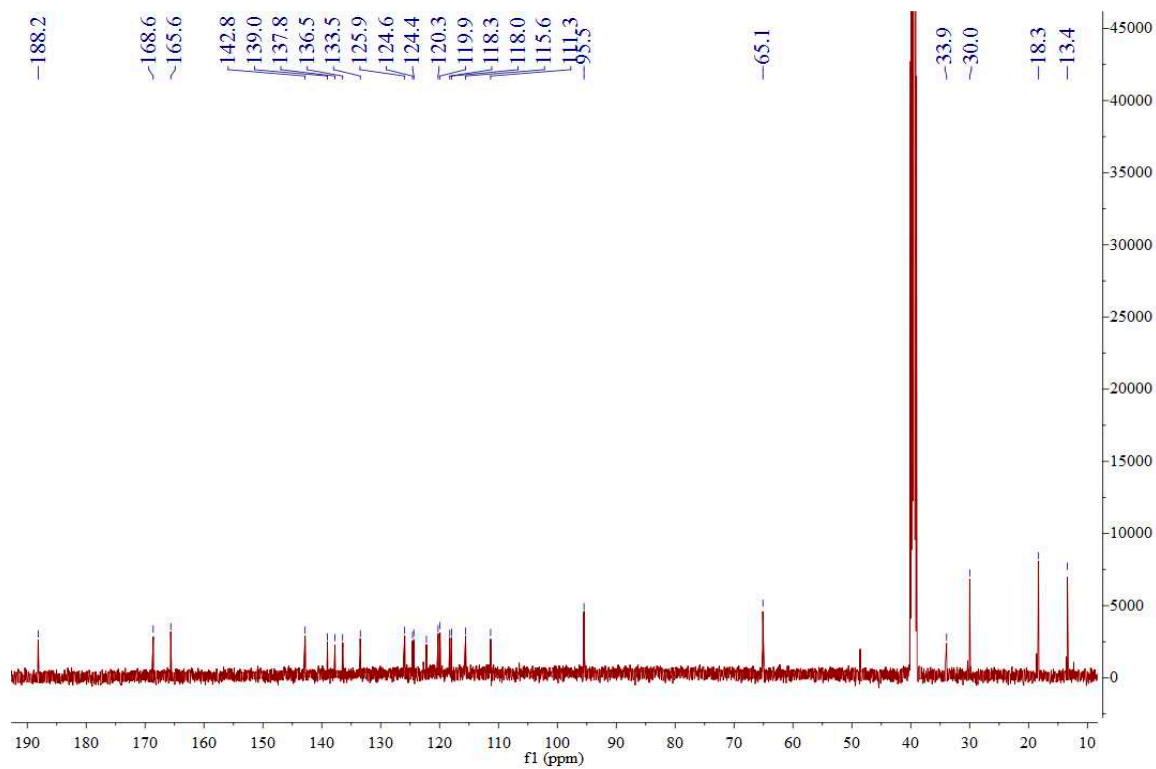Figure S11.  $^{13}\text{C}$  NMR spectrum of **2** in  $\text{DMSO-}d_6$ .

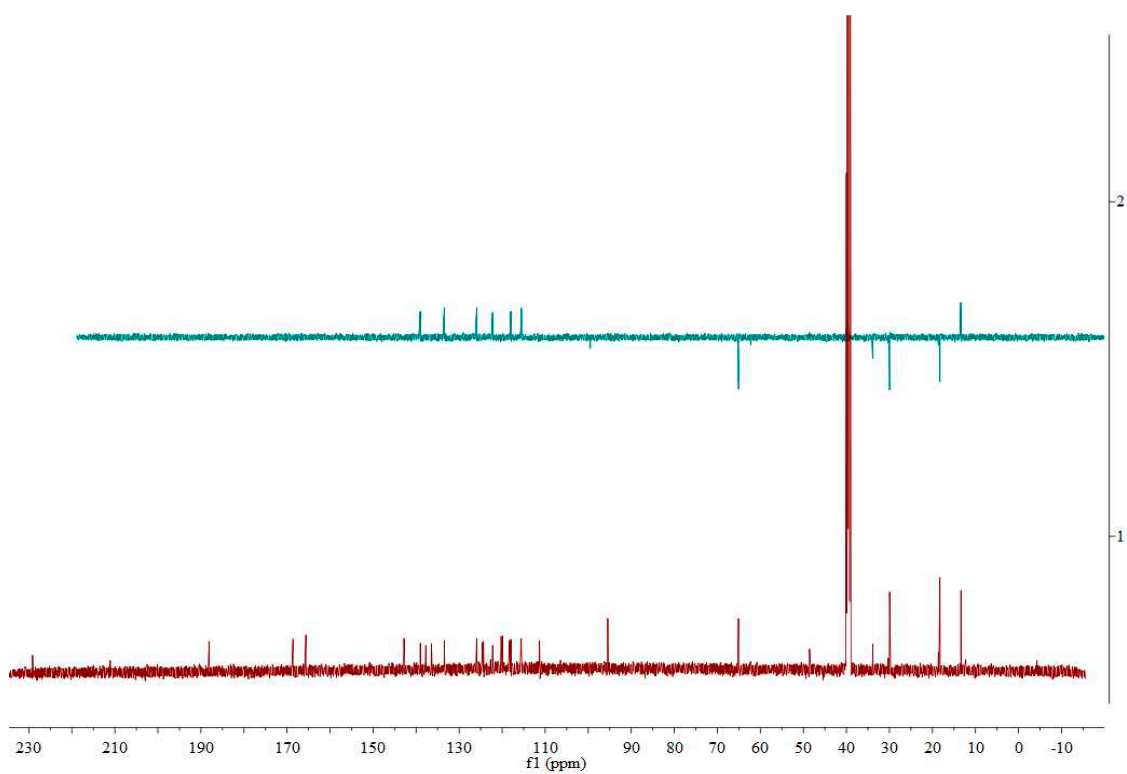

Figure S12. DEPT NMR spectrum of **2** in DMSO-*d*<sub>6</sub>.

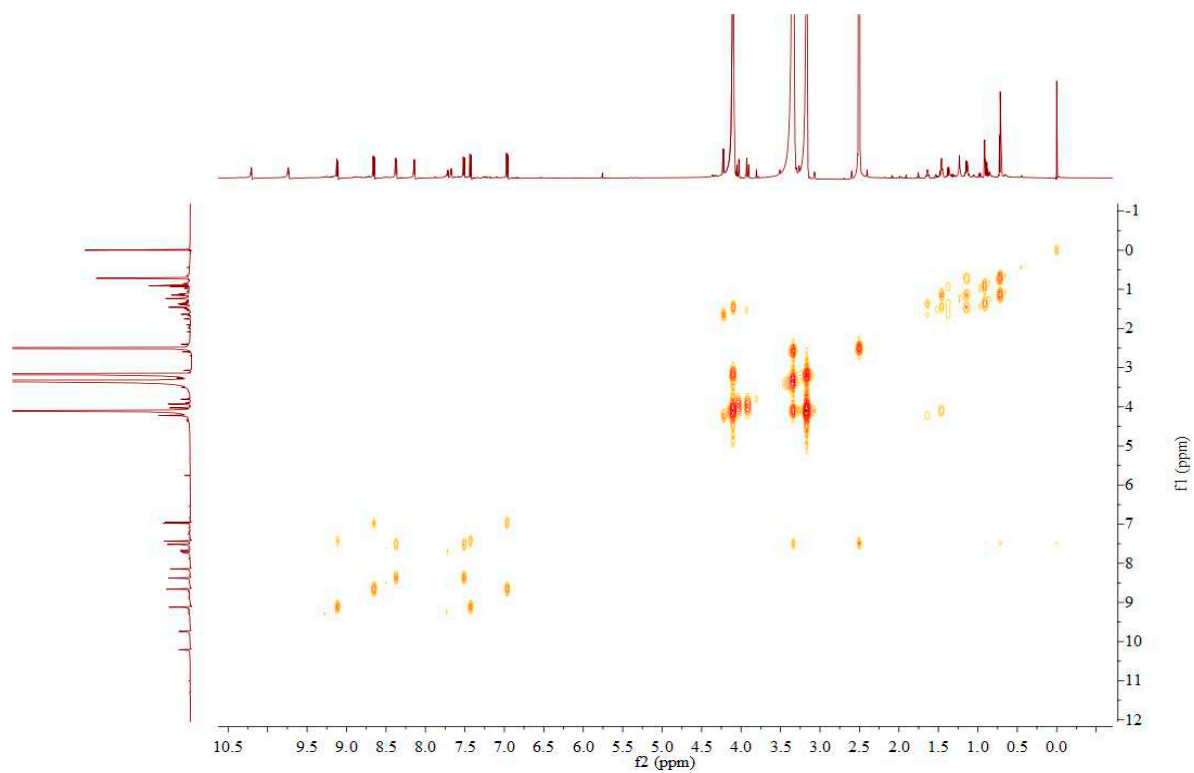

Figure S13. <sup>1</sup>H-<sup>1</sup>H COSY spectrum of **2** in DMSO-*d*<sub>6</sub>.

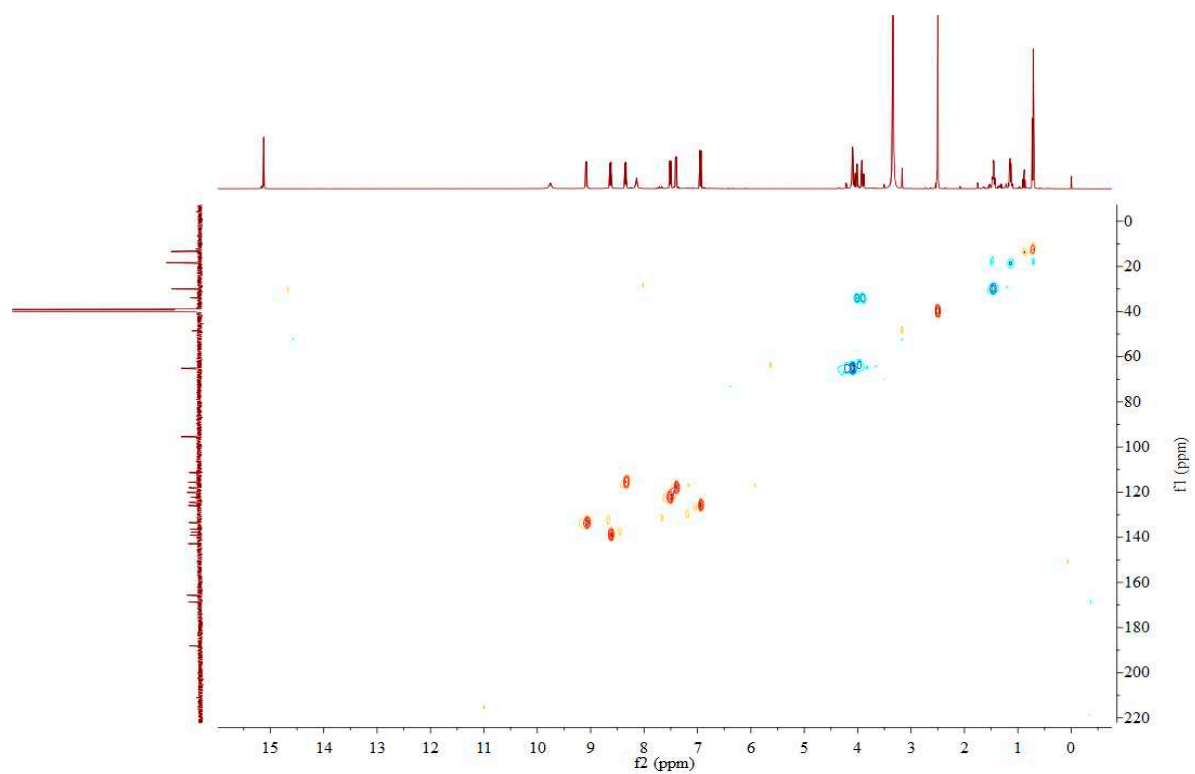

Figure S14. HSQC spectrum of 2 in DMSO-*d*<sub>6</sub>.

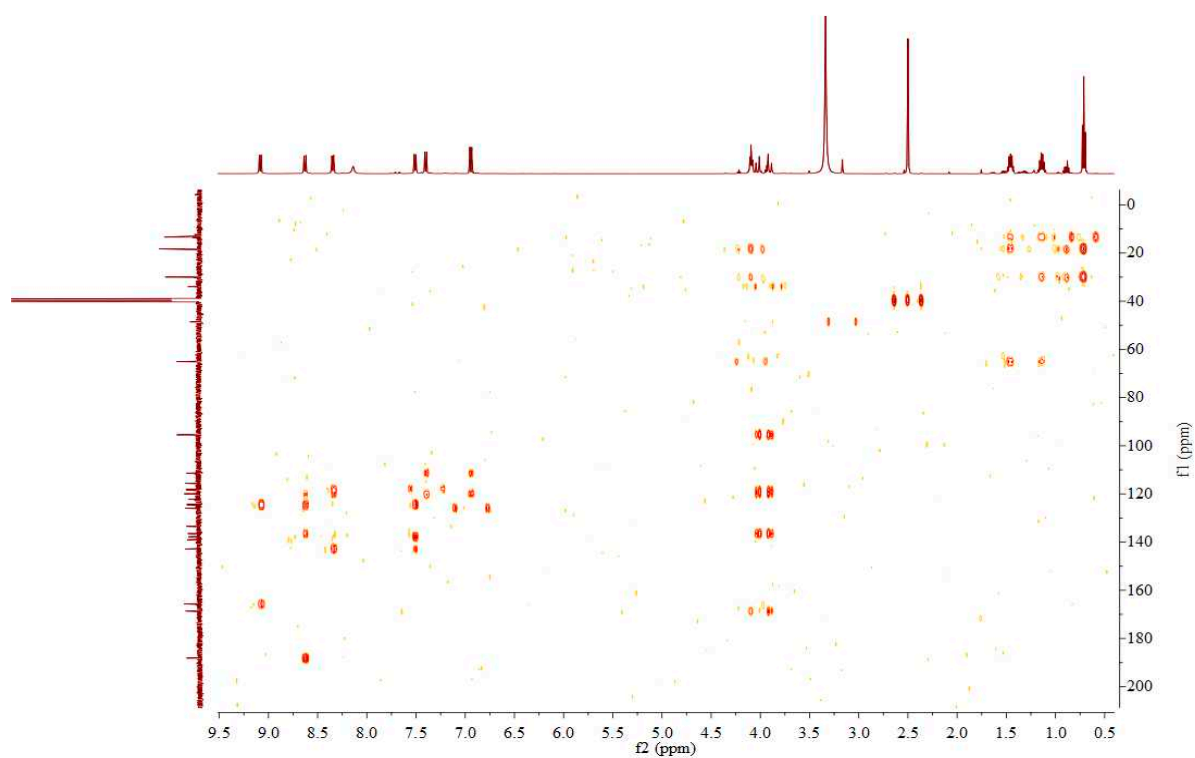

Figure S15. HMBC spectrum of 2 in DMSO-*d*<sub>6</sub>.

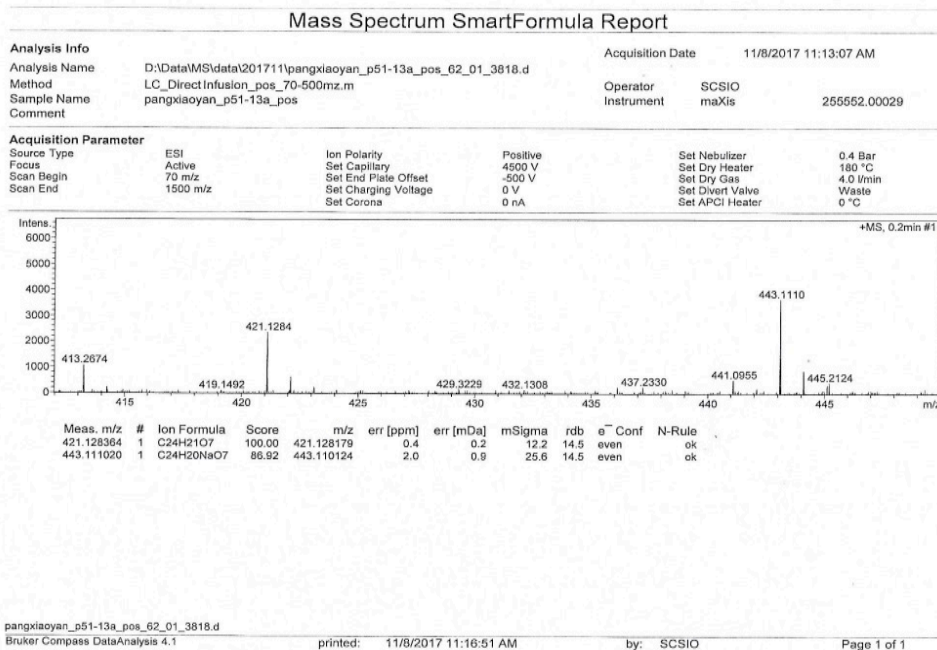Figure S16. HRESIMS spectrum of 2 in CD<sub>3</sub>OD.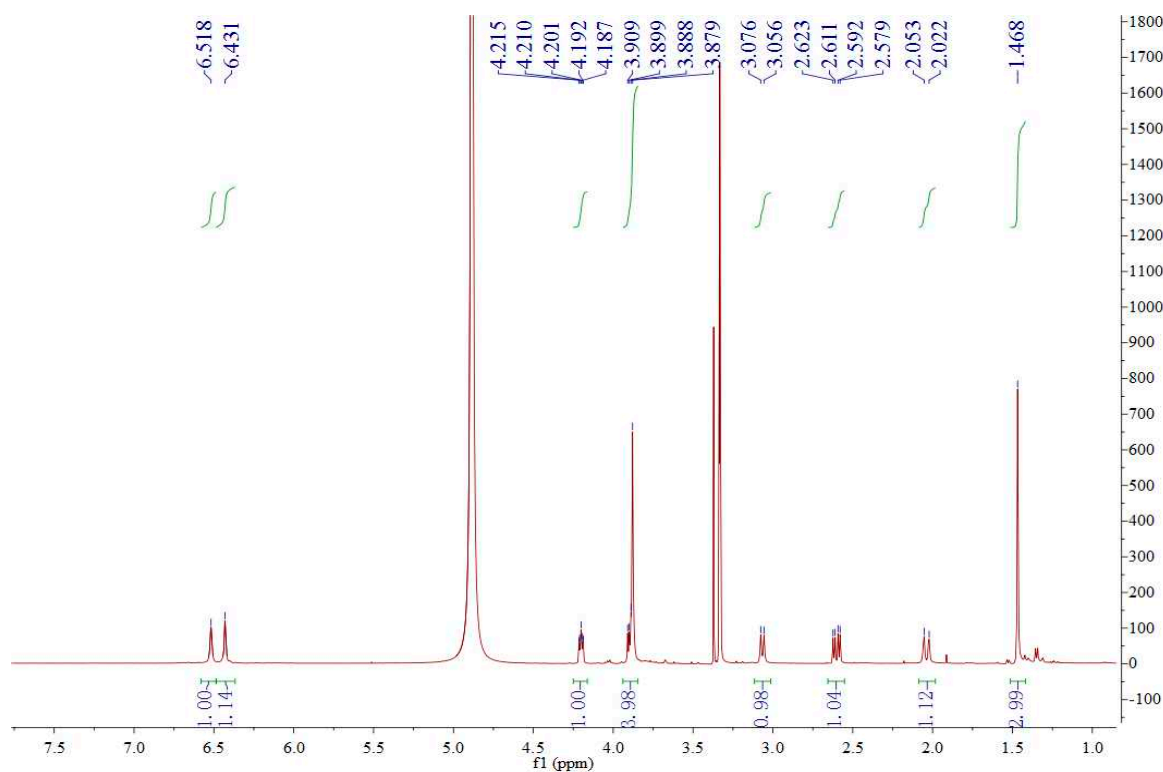Figure S17. <sup>1</sup>H NMR spectrum of 3 in CD<sub>3</sub>OD.

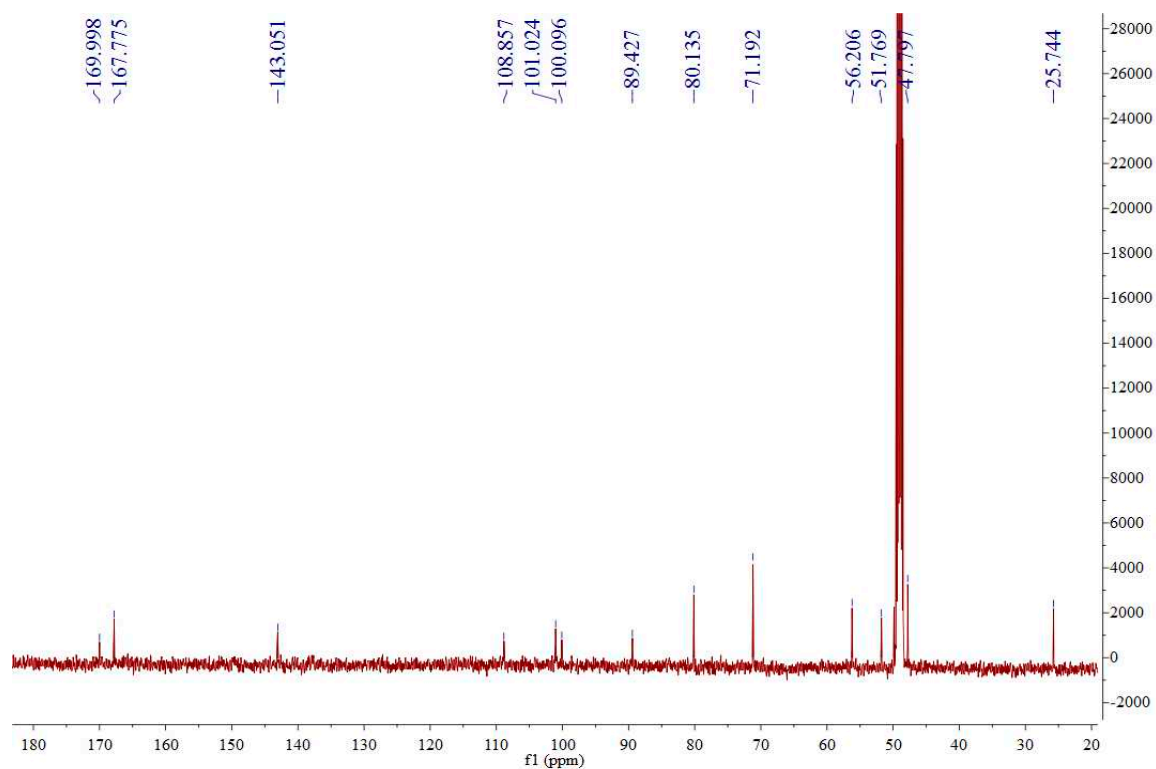

Figure S18.  $^{13}\text{C}$  NMR spectrum of 3 in  $\text{CD}_3\text{OD}$ .

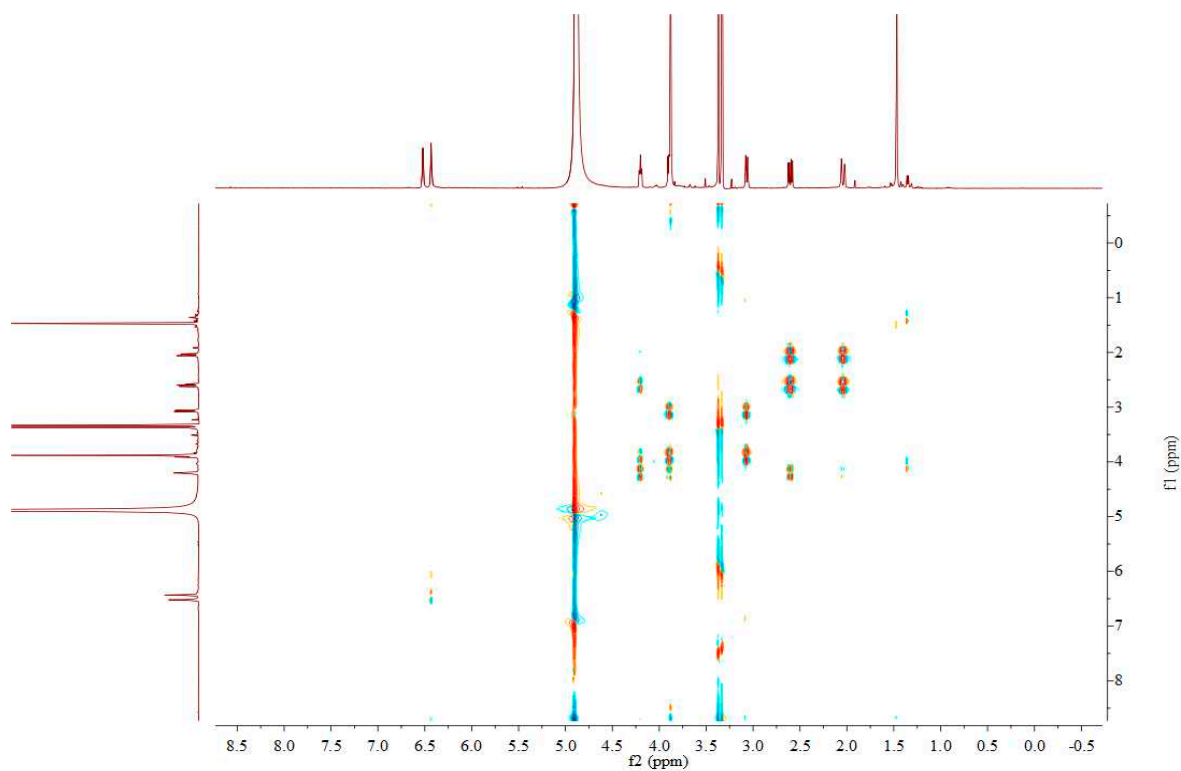

Figure S19.  $^1\text{H}$ - $^1\text{H}$  COSY spectrum of 3 in  $\text{CD}_3\text{OD}$ .

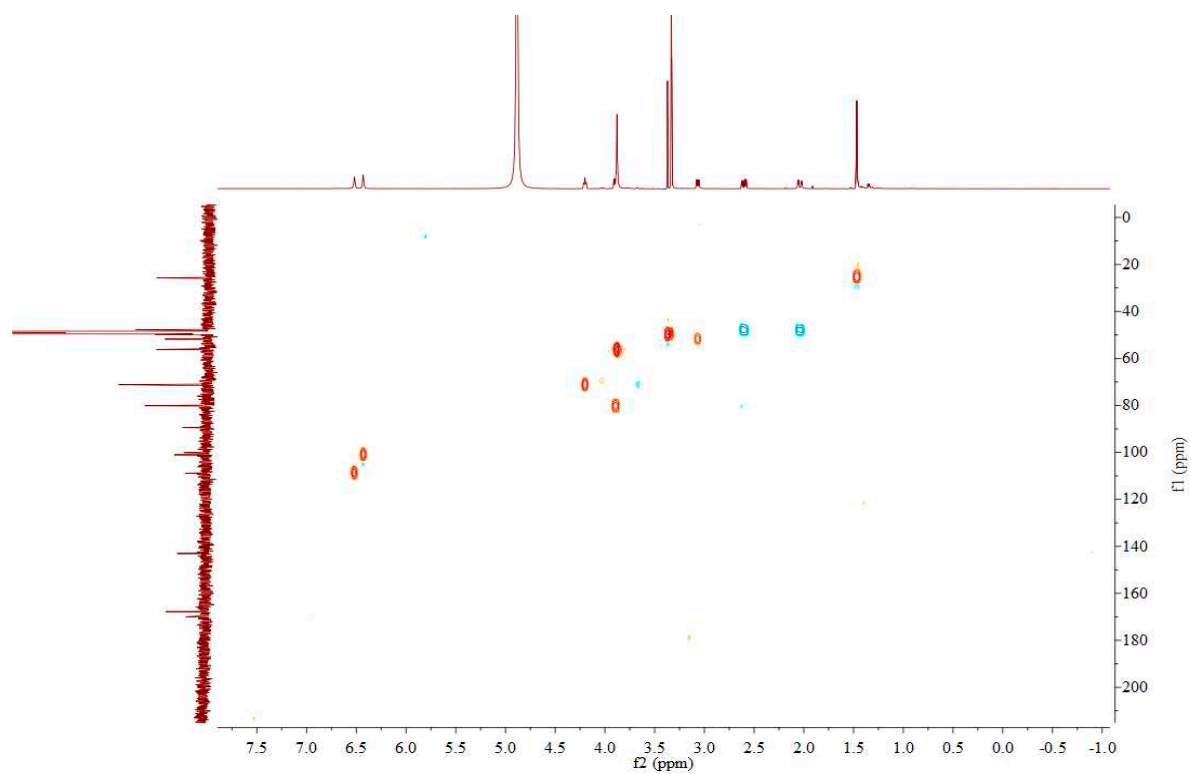

Figure S20. HSQC spectrum of 3 in CD<sub>3</sub>OD.

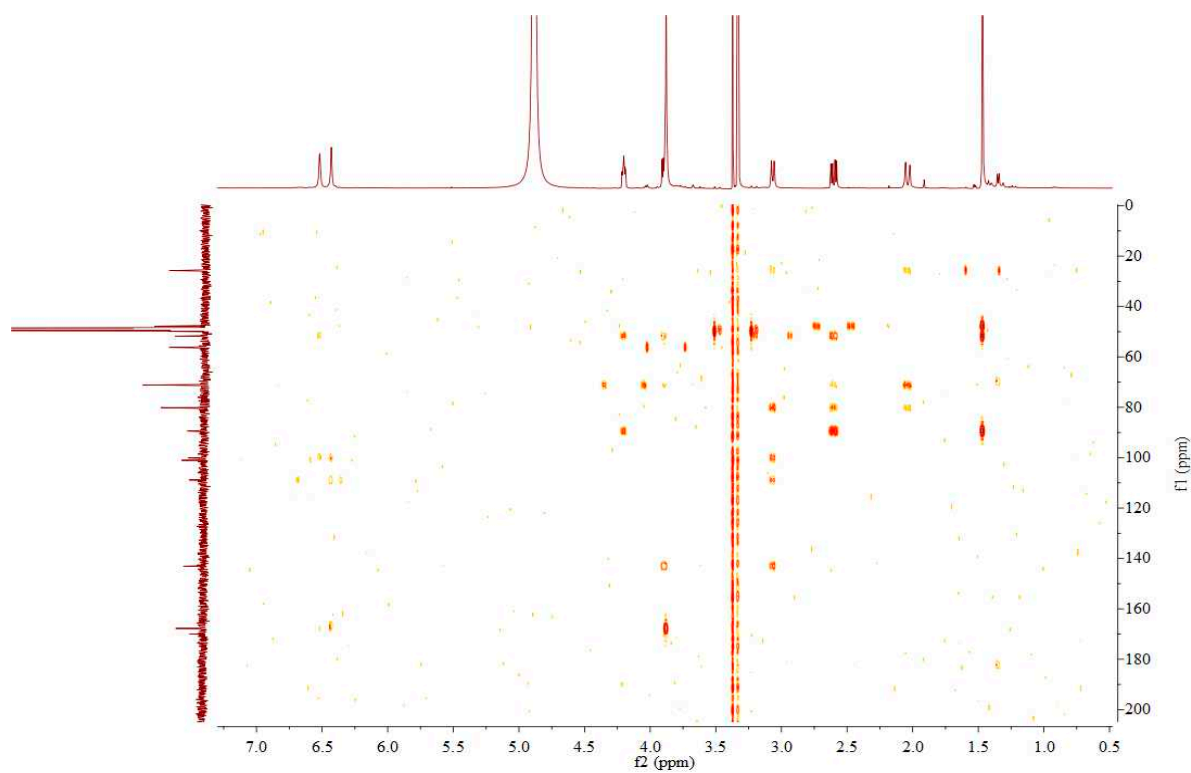

Figure S21. HMBC spectrum of 3 in CD<sub>3</sub>OD.

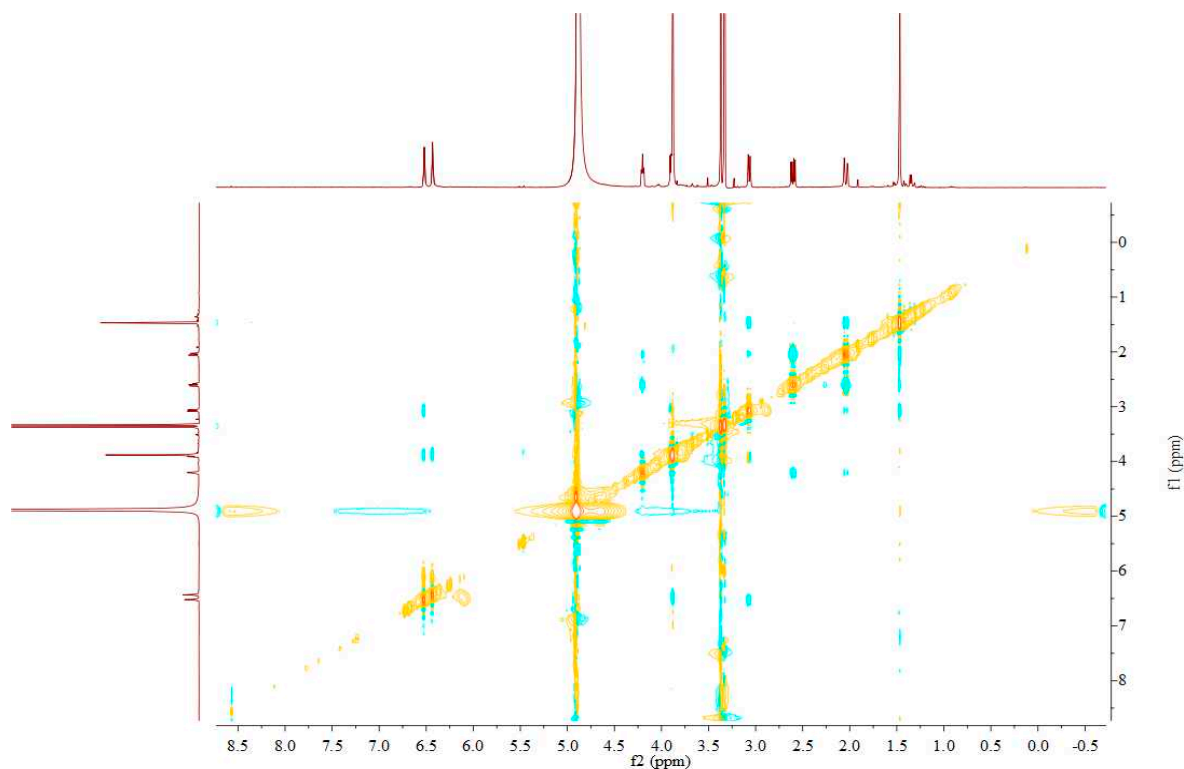Figure S22. NOESY spectrum of **2** in CD<sub>3</sub>OD.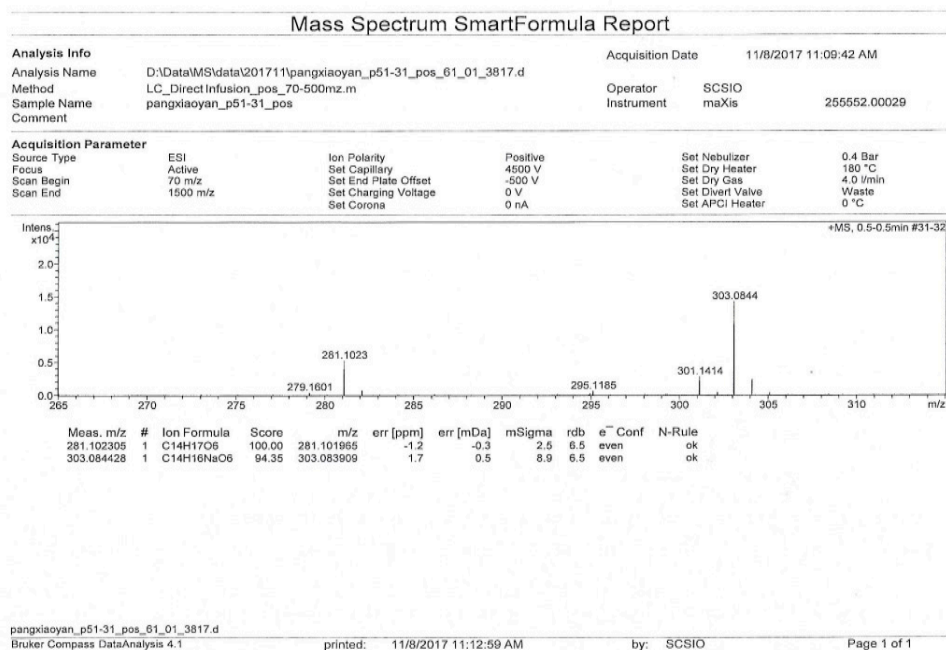Figure S23. HRESIMS spectrum of **3** in CD<sub>3</sub>OD.

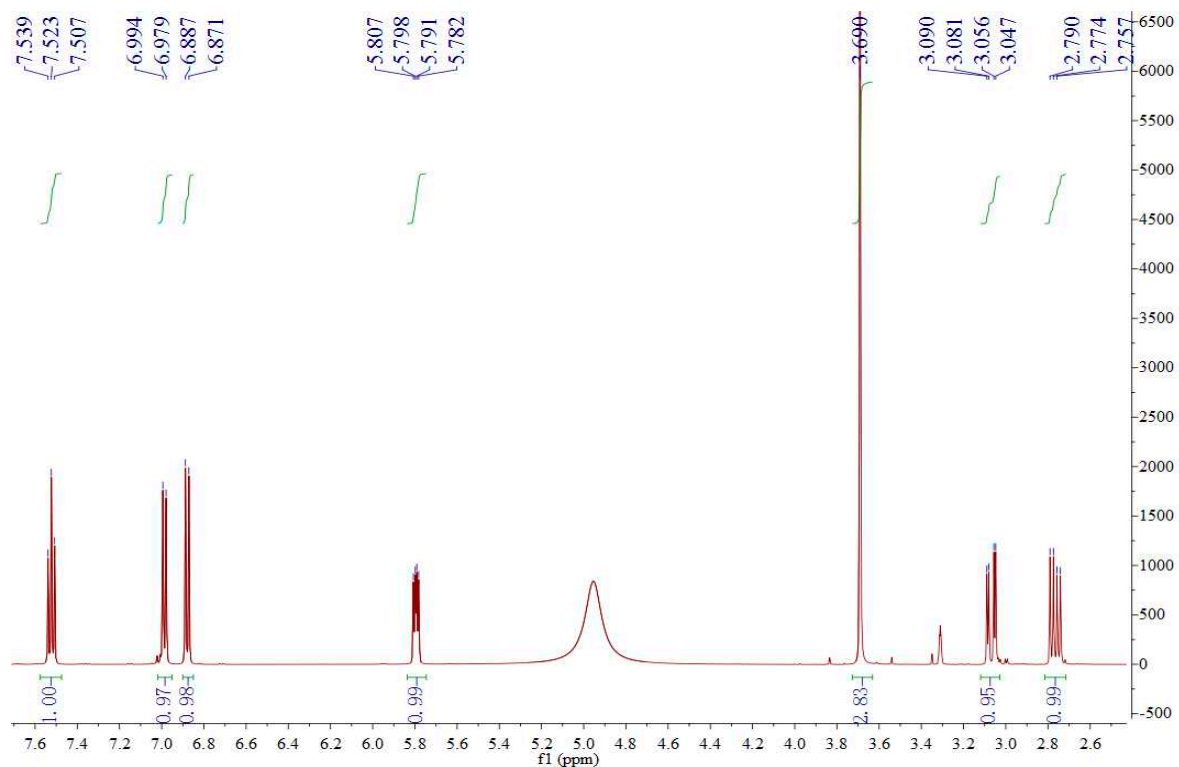

Figure S24. <sup>1</sup>H NMR spectrum of 4/5 in CD<sub>3</sub>OD.

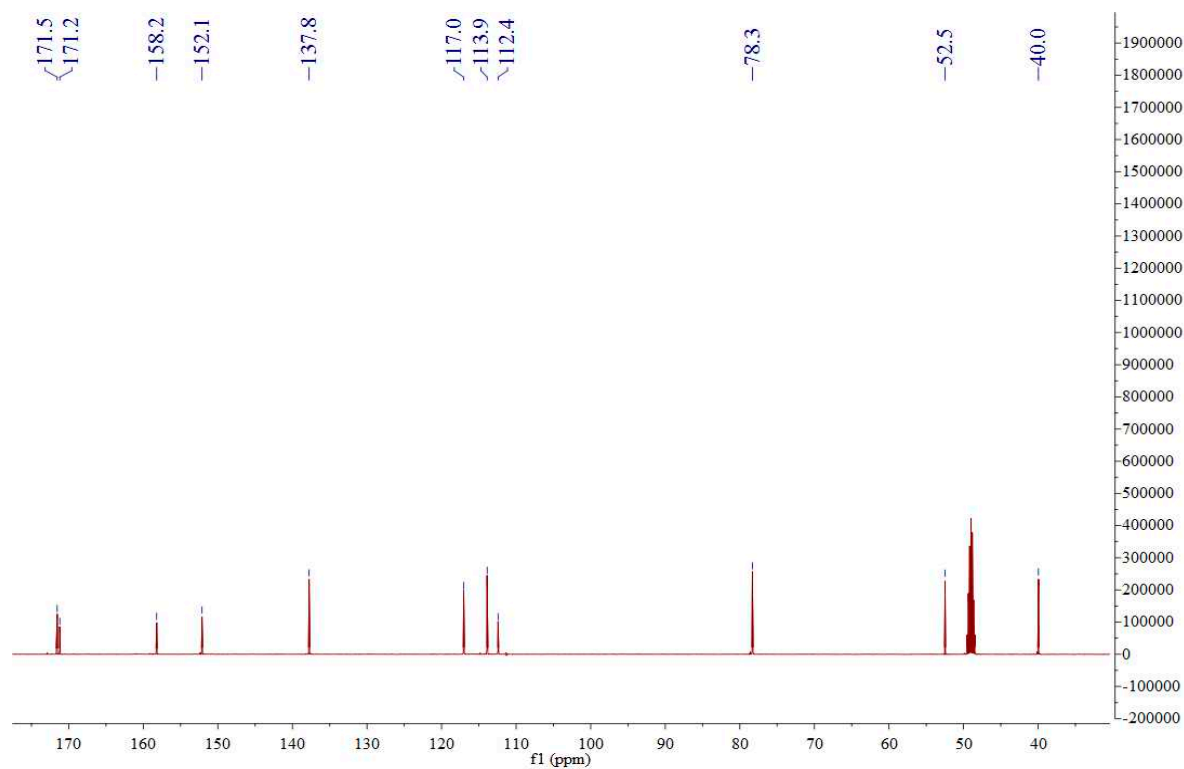

Figure S25. <sup>13</sup>C NMR spectrum of 4/5 in CD<sub>3</sub>OD.



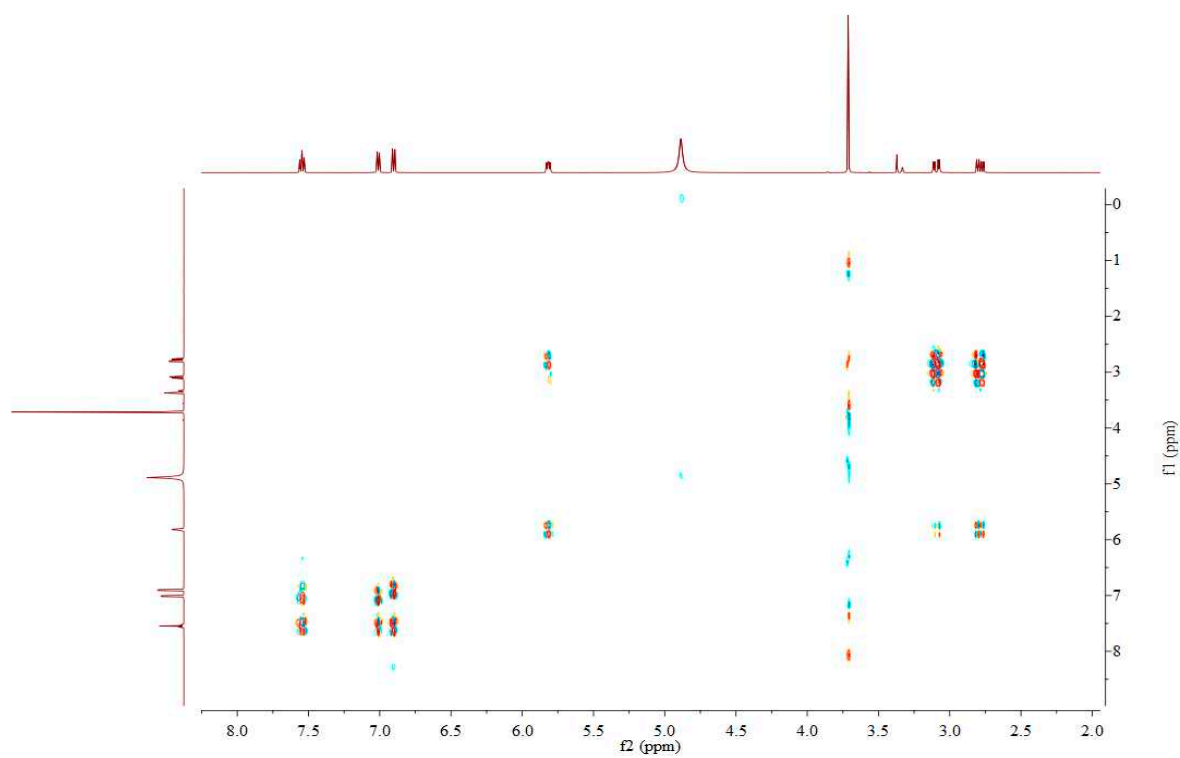

Figure S26.  $^1\text{H}$ - $^1\text{H}$  COSY spectrum of 4/5 in  $\text{CD}_3\text{OD}$ .

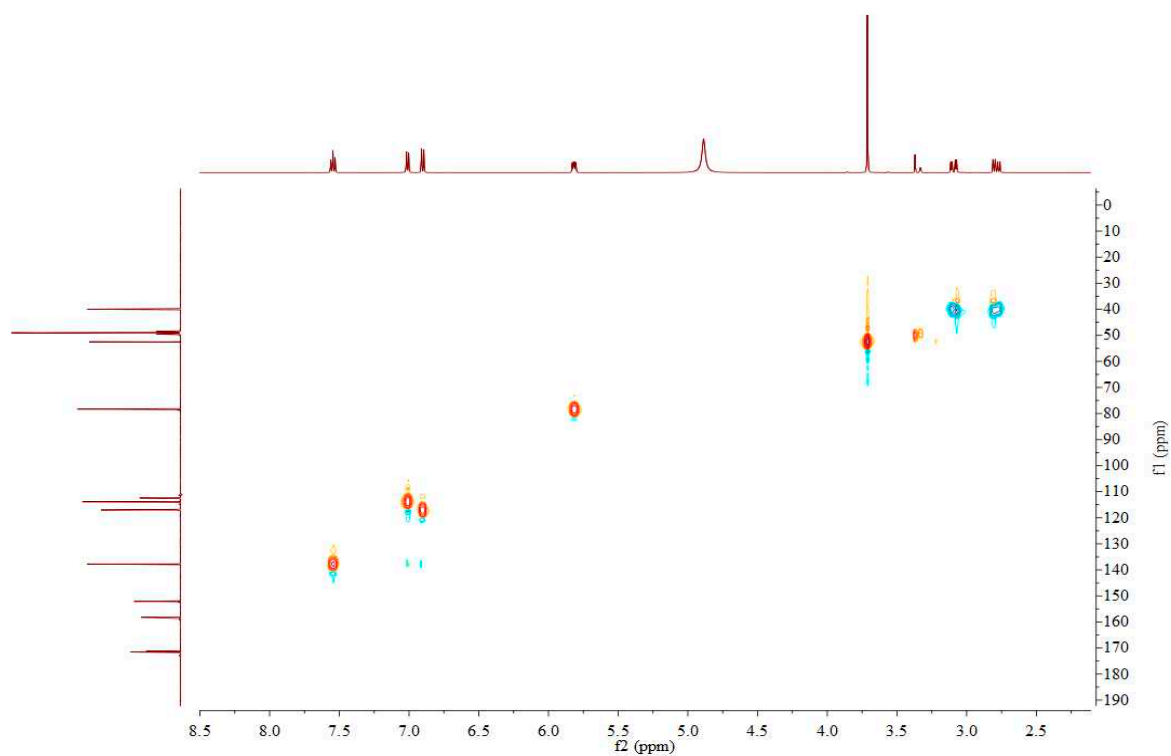

Figure S27. HSQC spectrum of 4/5 in  $\text{CD}_3\text{OD}$ .

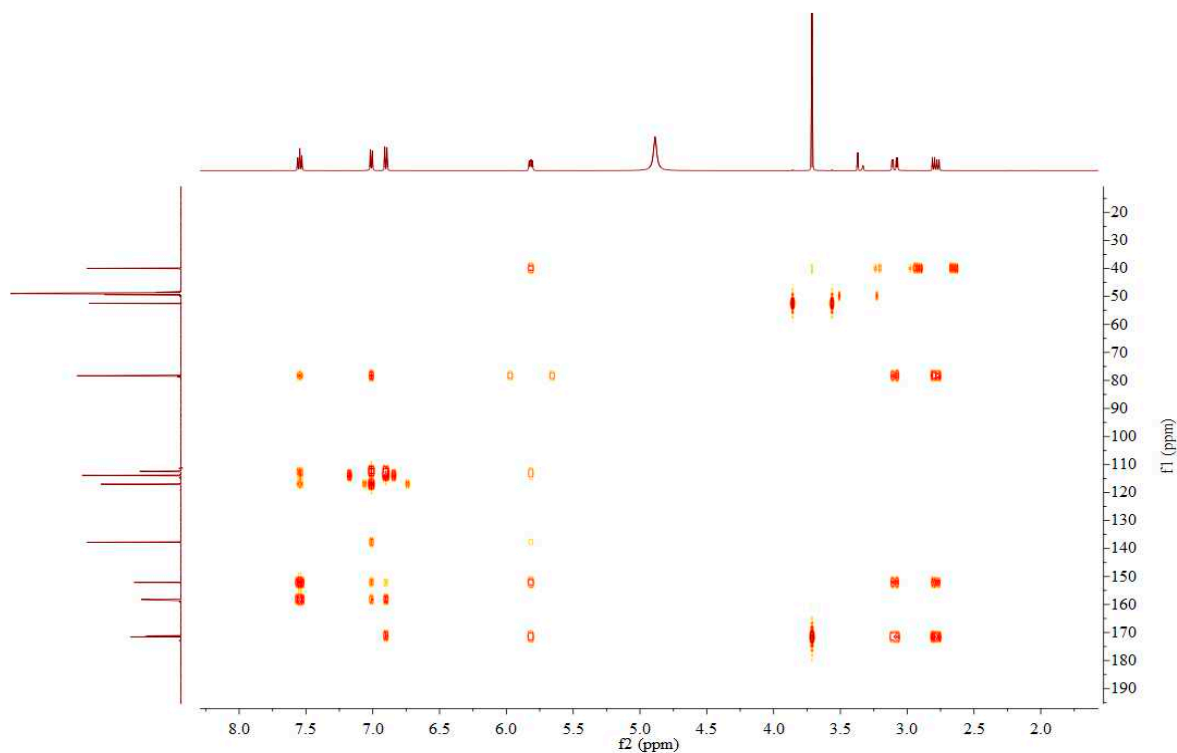Figure S28. HMBC spectrum of 4/5 in CD<sub>3</sub>OD.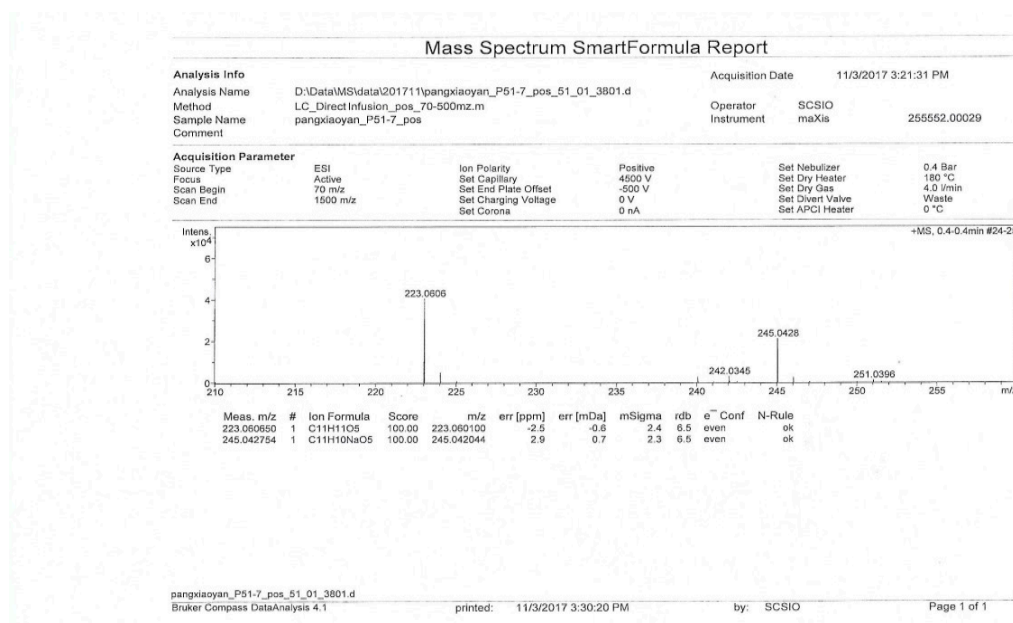Figure S29. HRESIMS spectrum of 4/5 in CD<sub>3</sub>OD.

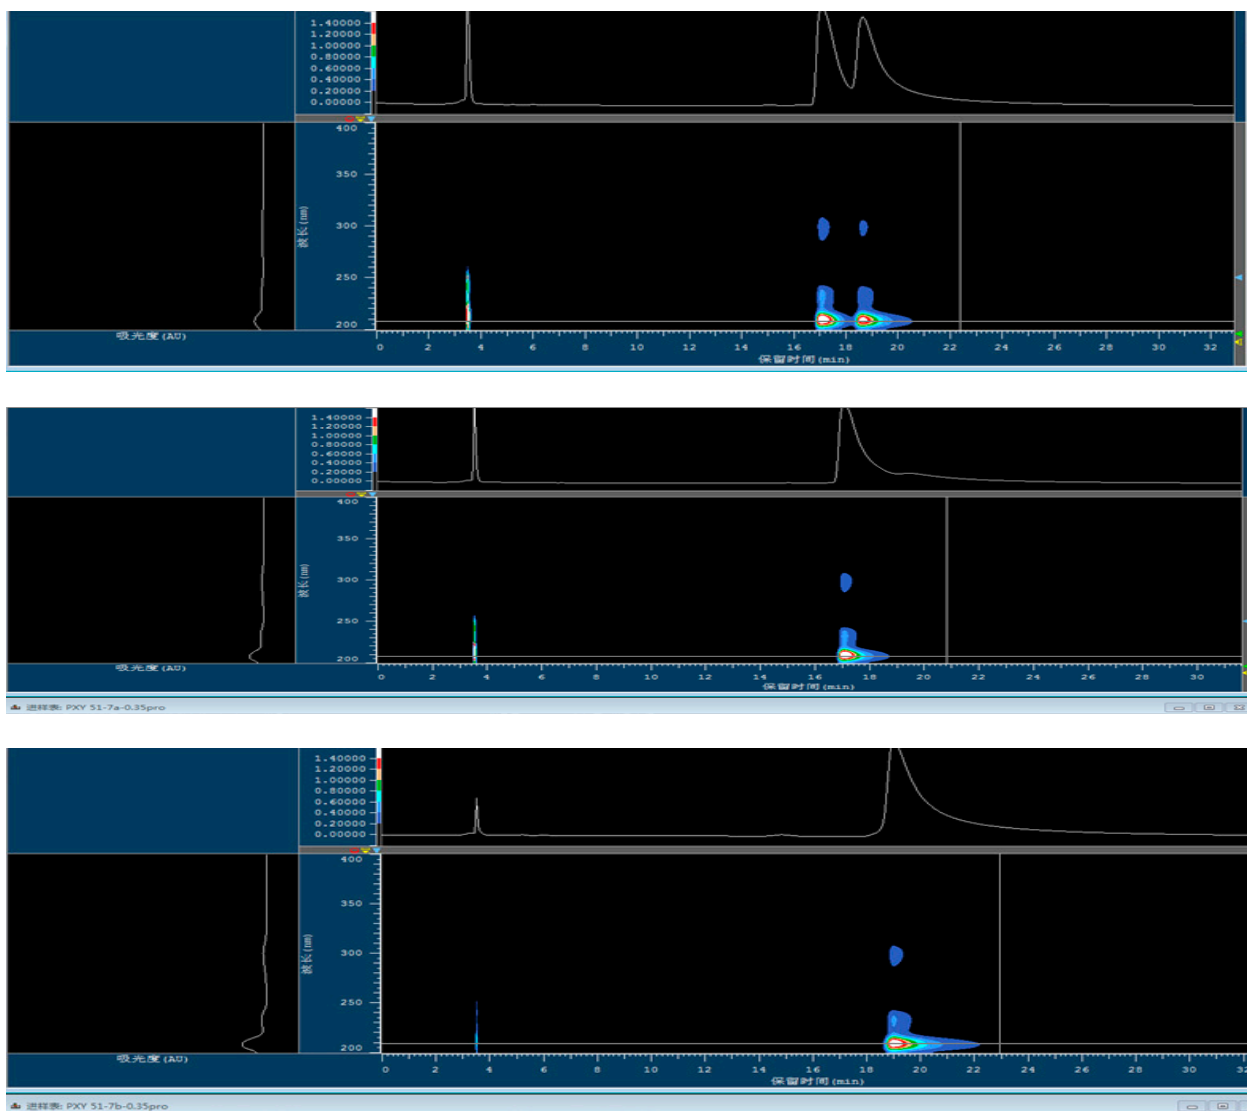

**Figure S30.** Chiral HPLC analyses of compounds **4** and **5** (Daicel Chiraloak IC-3 column, 4.6 mm × 25 mm, eluent n-hexane–iso-propanol, 65:35 *v/v*, 1 mL/min).

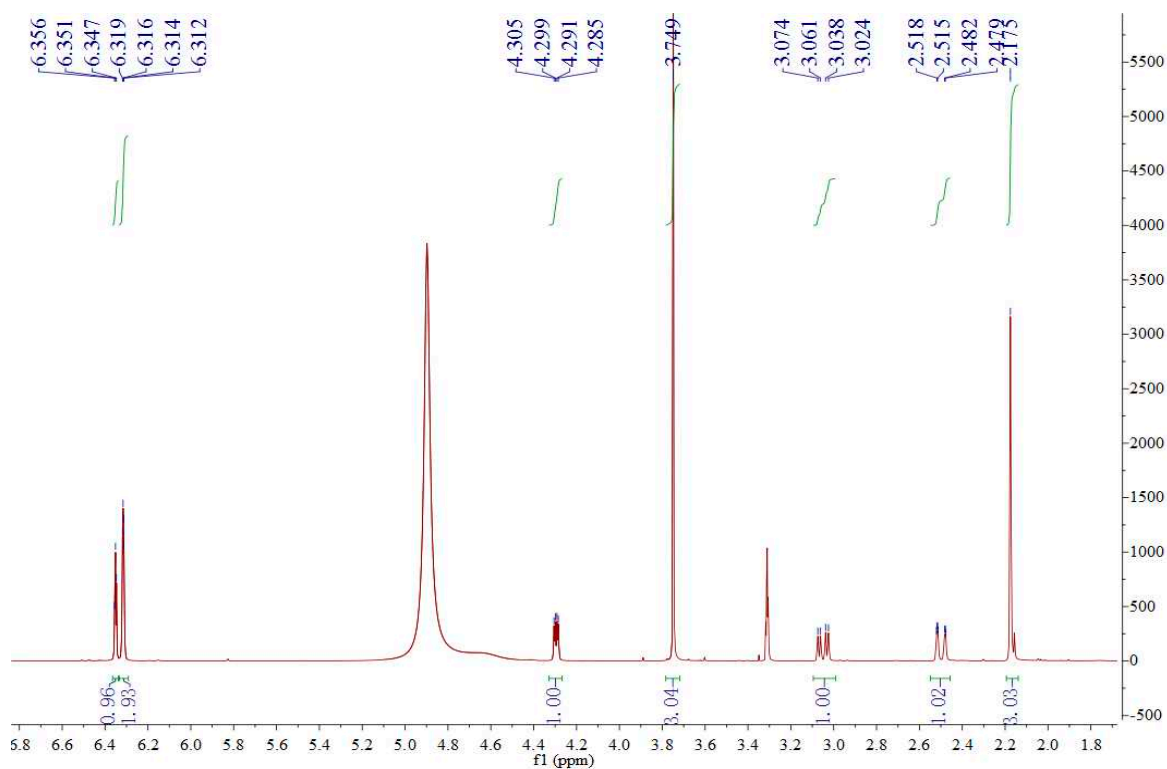Figure S31. <sup>1</sup>H NMR spectrum of 6/7 in CD<sub>3</sub>OD.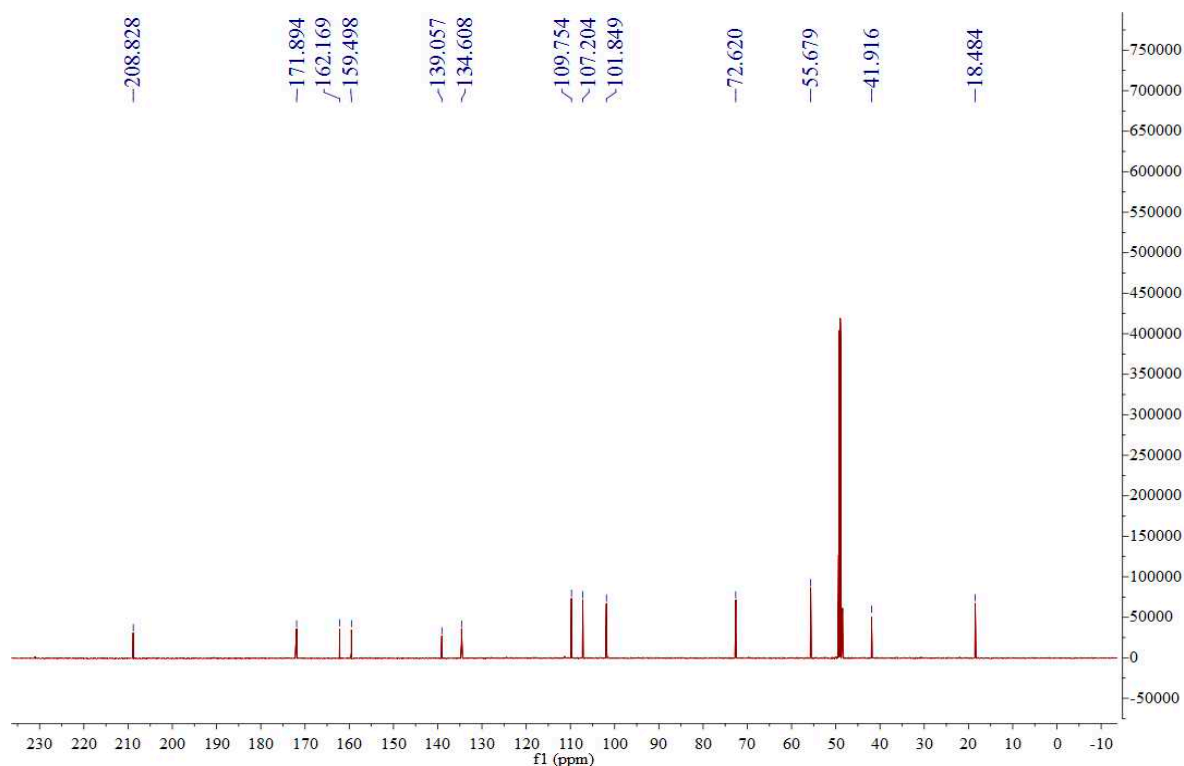Figure S32. <sup>13</sup>C NMR spectrum of 6/7 in CD<sub>3</sub>OD.

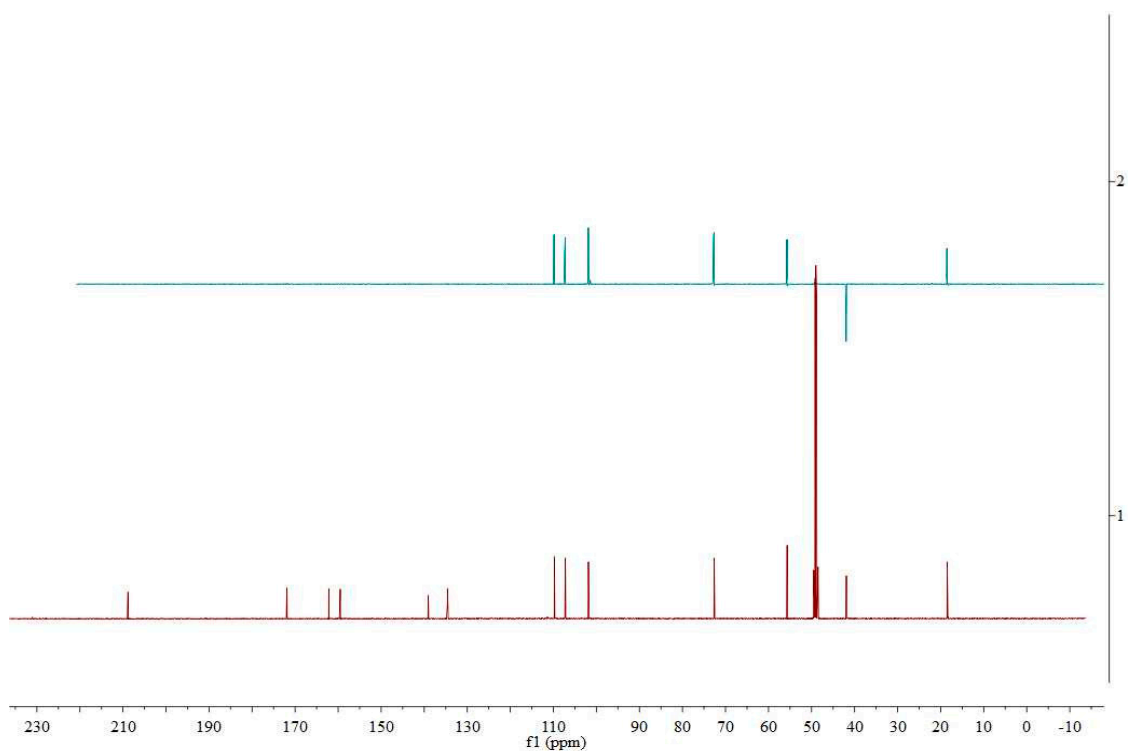

Figure S33. DEPT NMR spectrum of 6/7 in CD<sub>3</sub>OD.

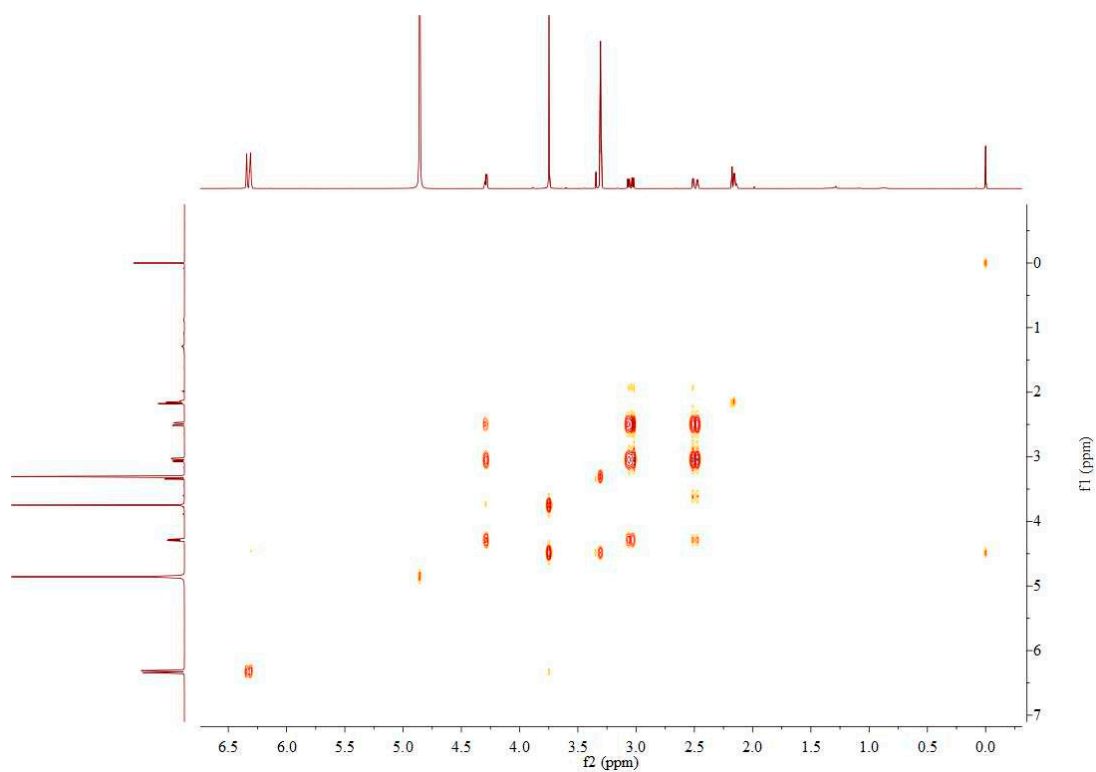

Figure S34. COSY spectrum of 6/7 in CD<sub>3</sub>OD.

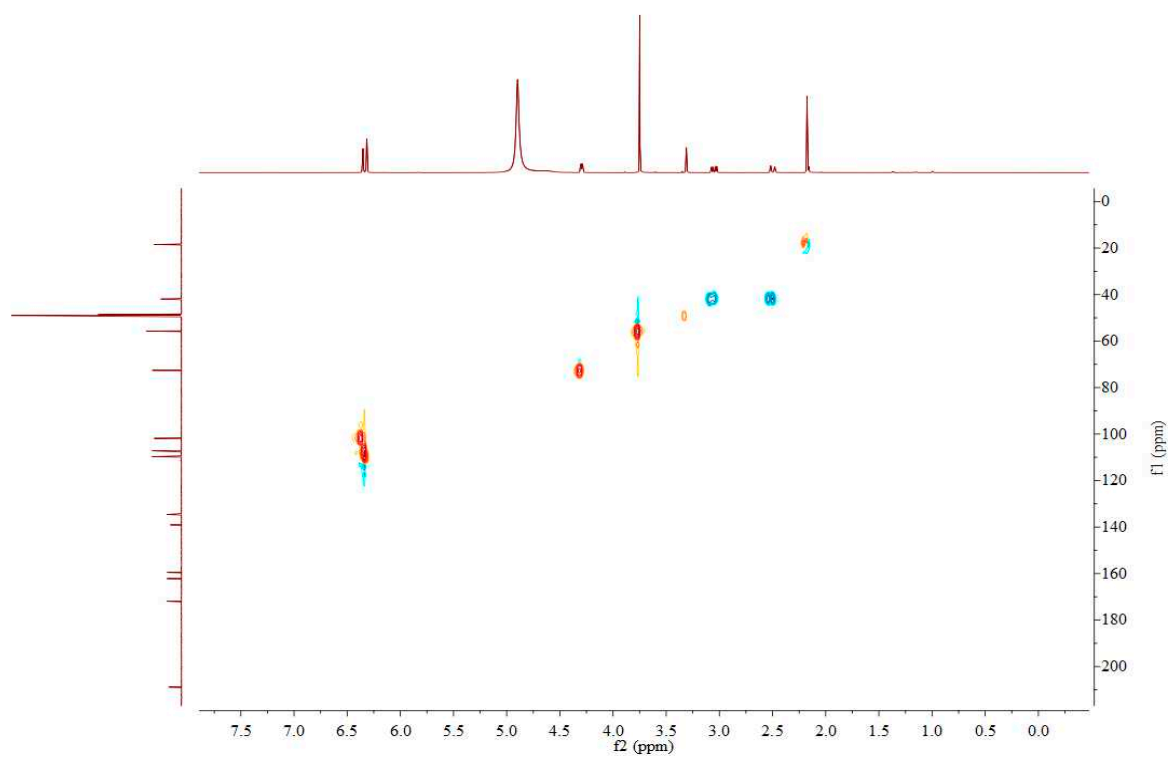

Figure S35. HSQC spectrum of 6/7 in CD<sub>3</sub>OD.

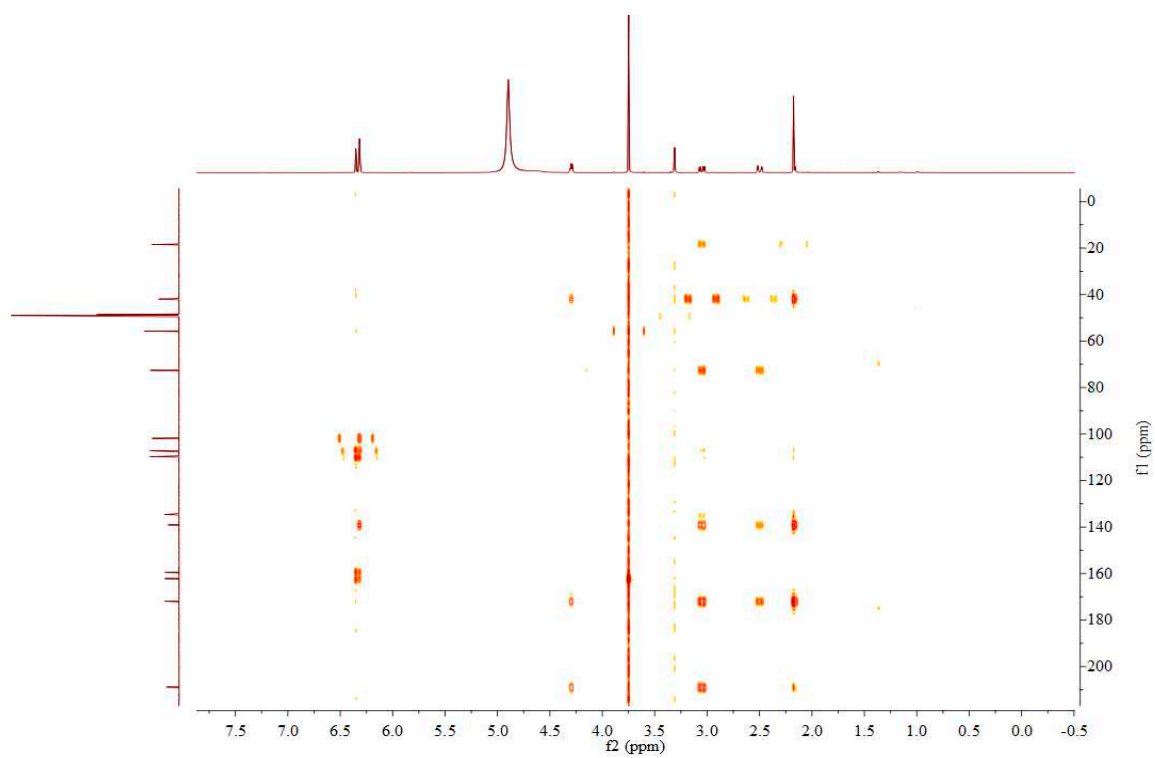

Figure S36. HMBC spectrum of 6/7 in CD<sub>3</sub>OD.

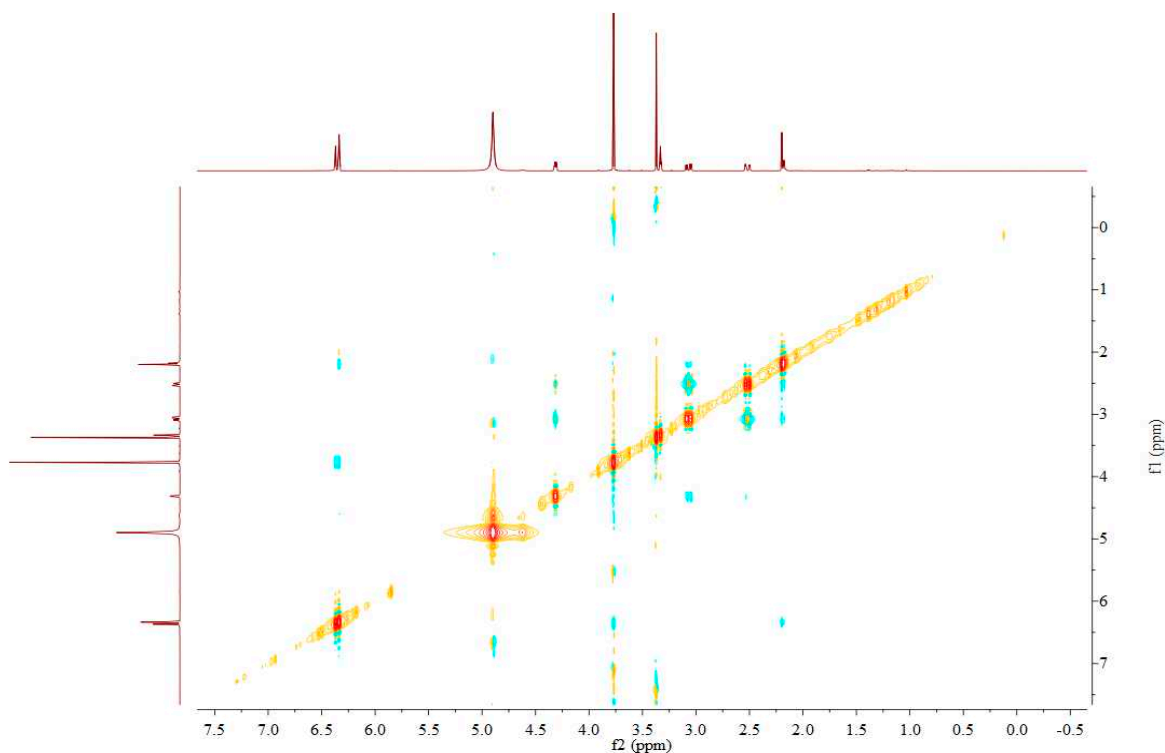

Figure S37. NOESY spectrum of 6/7 in CD<sub>3</sub>OD.

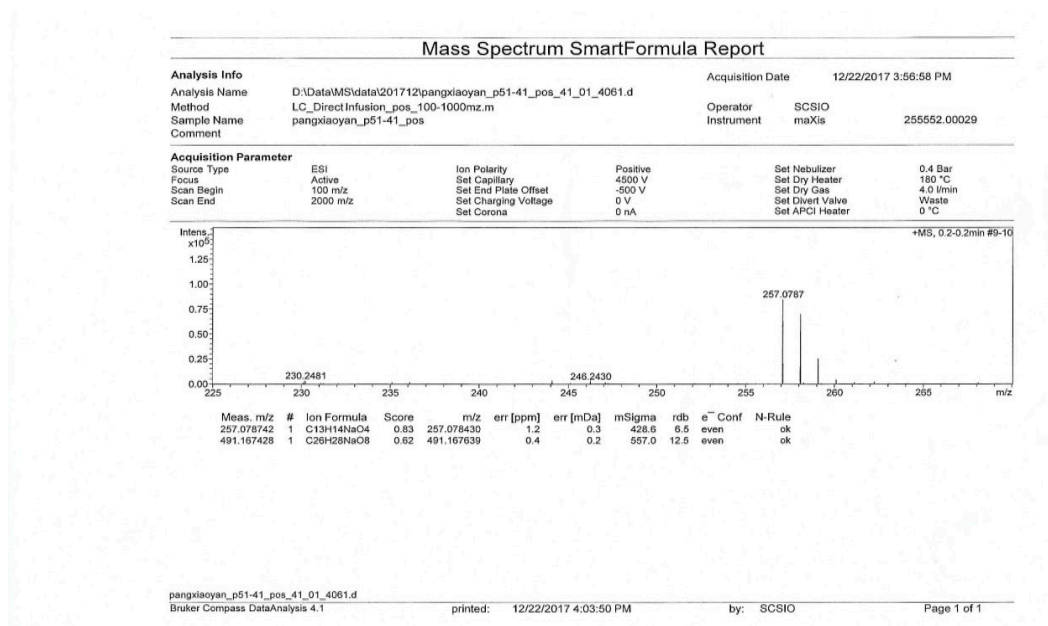

Figure S38. HRESIMS spectrum of 6/7 in CD<sub>3</sub>OD.

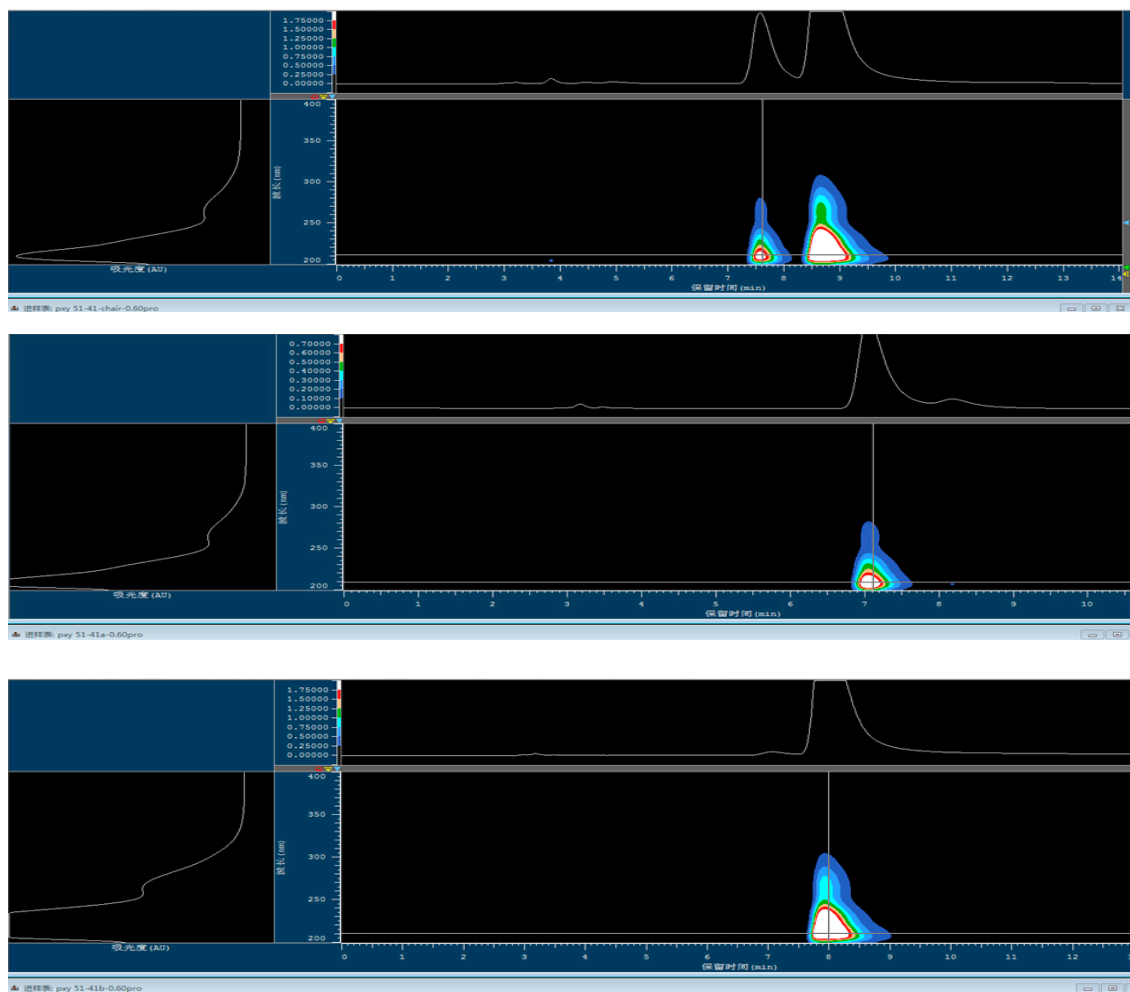

**Figure S39.** Chiral HPLC analyses of compounds 6 and 7 (Phenomenex Lux Cellulose-2, 4.6 mm × 25 mm, eluent n-hexane–iso-propanol, 40:60 *v/v*, 1 mL/min).
